**Title:** Revealing neuro-computational mechanisms of reinforcement learning and decision-making with the hBayesDM package

**Authors:**

Woo-Young Ahn<sup>1</sup>, Ph.D.

Nathaniel Haines<sup>1</sup>, B.A.

Lei Zhang<sup>2</sup>, M.S.

<sup>1</sup> Department of Psychology, The Ohio State University, Columbus, OH

<sup>2</sup> Institute for Systems Neuroscience, University Medical Center Hamburg-Eppendorf, Hamburg, Germany

**Correspondence:**

Woo-Young Ahn, Ph.D.

Department of Psychology

The Ohio State University

1835 Neil Avenue, Columbus, OH 43210

Tel: (614) 247-7670, Fax: (614) 688-8261. Email: [ahn.280@osu.edu](mailto:ahn.280@osu.edu)

**Conflict of Interest:** The authors declare no competing financial interests.

**Keywords:** Reinforcement learning; decision-making, hierarchical Bayesian modeling, model-based fMRI

Word count (Abstract): 276

Word count (Main text): 8,375

Number of figures / tables: 6 / 2

## Abstract

Reinforcement learning and decision-making (RLDM) provide a quantitative framework, which allows us to specify psychiatric conditions with basic dimensions of neurocognitive functioning. RLDM offer a novel approach to assess and potentially diagnose psychiatric patients, and there is growing enthusiasm on RLDM and Computational Psychiatry among clinical researchers. Such a framework can also provide insights into the brain substrates of particular RLDM processes as exemplified by model-based functional magnetic resonance imaging (fMRI) or electroencephalogram (EEG). However, many researchers often find the approach too technical and have difficulty adopting it for their research. Thus, there remains a critical need to develop a user-friendly tool for the wide dissemination of computational psychiatric methods. We introduce an R package called hBayesDM (*h*ierarchical *B*ayesian modeling of *D*ecision-*M*aking tasks), which offers computational modeling on an array of RLDM tasks and social exchange games. The hBayesDM package offers state-of-the-art hierarchical Bayesian modeling, where both individual and group parameters (i.e., posterior distributions) are estimated simultaneously in a mutually constraining fashion. At the same time, it is extremely user-friendly: users can perform computational modeling, output visualization, and Bayesian model comparisons—each with a single line of coding. Users can also extract trial-by-trial latent variables (e.g., prediction errors) required for model-based fMRI/EEG. With the hBayesDM package, we anticipate that anyone with minimal knowledge of programming can take advantage of cutting-edge computational modeling approaches and investigate the underlying processes of and interactions between multiple decision-making (e.g., goal-directed, habitual, and Pavlovian) systems. In this way, it is our expectation that the hBayesDM package will contribute to the dissemination of advanced modeling approaches and enable a wide range of researchers to easily perform computational psychiatric research within their populations.

## 1. Introduction

Computational modeling (a.k.a., cognitive modeling) describes human information processing with basic principles of cognition, which are defined in formal mathematical notations. Unlike verbalized or conceptualized approaches, computational modeling has the merit of allowing researchers to generate precise predictions and quantitatively test competing hypotheses (Busemeyer & Diederich, 2010; Forstmann & Wagenmakers, 2015; Lewandowsky & Farrell, 2010). Computational modeling has been particularly useful in reinforcement learning and decision-making (RLDM) fields (Dayan & Daw, 2008; Rangel, Camerer, & Montague, 2008); computational modeling has also been integrated into the analysis of neural data including functional magnetic resonance imaging (fMRI) and electroencephalogram (EEG) data (e.g., Cavanagh, Eisenberg, Guitart-Masip, Huys, & Frank, 2013; Daw, O'Doherty, Dayan, Seymour, & Dolan, 2006; Gläscher, Hampton, & O'Doherty, 2009; Hampton, 2006; Iglesias et al., 2013; Li, Schiller, Schoenbaum, Phelps, & Daw, 2011; Mars et al., 2008; O'Doherty, Hampton, & Kim, 2007; O'Doherty, Dayan, Schultz, & Deichmann, 2004; Xiang, Lohrenz, & Montague, 2013).

As summarized in recent review papers (Ahn & Busemeyer, 2016; Friston, Stephan, Montague, & Dolan, 2014; Huys, Maia, & Frank, 2016; Montague, Dolan, Friston, & Dayan, 2012; Stephan, Bach, et al., 2016a; Stephan, Binder, et al., 2016b; Stephan, Iglesias, Heinzle, & Diaconescu, 2015; X.-J. Wang & Krystal, 2014; Wiecki, Poland, & Frank, 2015), computational modeling has gained much attention for its usefulness in investigating psychiatric conditions. Exemplified by the Research Domain Criteria and Precision Medicine (RDoC; Insel, 2014), there is also a growing consensus that diagnosis and treatment decisions should incorporate underlying cognitive and neurobiological underpinnings of psychiatric conditions instead of relying only on behavioral symptoms. To this end, a new field called *Computational Psychiatry* (e.g., Friston et al., 2014; Montague et al., 2012) aims to discover neurocognitive mechanisms underlying normal and abnormal conditions by combining cutting-edge neurobiological and computational tools.

Performing computational psychiatric research, however, especially computational modeling, is a challenging task for many clinical researchers or those with limited quantitative skills. Computational modeling involves multiple steps including designing/adopting laboratory tasks, building a theoretical framework of the task with a set of assumptions and mathematical equations, formulating multiple computational models based on the assumptions, estimating model parameters of each model, and quantitatively comparing the models of interest (e.g., Busmeyer & Diederich, 2010; Wiecki et al., 2015). It is a pressing issue how to train clinical researchers in mental health (e.g., psychiatrists and clinical psychologists) so that they can receive in-depth training across several related fields including cognitive science, advanced statistics, and neuroscience (Montague et al., 2012). For the dissemination of Computational Psychiatry, we believe there remains a critical need to develop user-friendly tools for computational modeling. In fact, there exist several software packages but most of them are for a single class of modeling such as sequential sampling models (Matzke et al., 2013; Wabersich & Vandekerckhove, 2014; Wiecki, Sofer, & Frank, 2013). An exception is the Variational Bayesian Analysis (VBA) MATLAB toolbox (Daunizeau, Adam, & Rigoux, 2014), which allows users to fit and compare various models with variational Bayesian algorithms. However, we believe users still need some amount of programming skills and background in computational modeling to model various tasks.

In this article, we describe a free R package, ***hBayesDM*** (*h*ierarchical *B*ayesian modeling of *D*ecision-*M*aking tasks), which we developed for the dissemination of computational modeling to a wide range of researchers. The hBayesDM package offers hierarchical Bayesian analysis (HBA; see **Section 3** for more details about HBA) of various computational models on an array of decision-making tasks (see **Table 1** for a list of tasks and models currently available). We aim to make the package extremely user-friendly: with hBayesDM, users can perform model fitting with HBA, output visualization, and model comparisons – *each with a single line of coding*. Example datasets are also available to make it easy to use hBayesDM. Users can also extract trial-by-trial latent variables (e.g., prediction errors) that are required for model-based fMRI/EEG (see **Section 5.5**). Users can not only perform Bayesian modeling of tasks implemented in the hBayesDM package, but also we make all source codes publicly

available so that other users can contribute to the package (also see our future directions in **Section 6**). By making all steps for computational modeling user-friendly, we hope the hBayesDM package will allow even researchers with minimal programming knowledge to perform certain computational psychiatric research.

The remainder of this article is organized as follows. First, we describe the list of tasks and models that are currently implemented in the hBayesDM package (**Section 2**). Second, we briefly describe HBA and why we adopt HBA for computational modeling (**Section 3**). Third, we explain the detailed mathematical formulation of hierarchical Bayesian models (**Section 4**). Fourth, we provide step-by-step tutorials on how to use the hBayesDM package (**Section 5**). Lastly, we discuss future plans and some limitations of the package (**Section 6**). Readers who are not interested in the technical details may skip **Section 3** and equations in **Section 4**.

## 2. Tasks and computational models implemented in hBayesDM

**Table 1** shows the list of tasks and computational models currently implemented in the hBayesDM package (as of version 0.2.3). Note that some tasks have multiple computational models and users can compare the model performance within the hBayesDM framework (see **Section 5**). To fit models to a task, prepare trial-by-trial data as a text file (\*.txt) where each row (observation) contains the columns required for the given task (see **Table 1**). Users can also follow its sample dataset as an example.

Below, we describe each task and its computational model(s), briefly review its applications to healthy and clinical populations, and list model parameters. We refer readers to original papers for the full details of experimental design and model parameters.

### 2.1. The Delay Discounting task

The Delay Discounting task (DDT; Rachlin, Raineri, & Cross, 1991) is designed to estimate how much an individual discounts temporally delayed outcomes in comparison to smaller-sooner ones. On each trial of the DDT, two options are presented: a sooner and smaller reward (e.g. \$5 now) and a later and larger reward (e.g. \$20 next week). Subjects are asked to choose which option they prefer on each trial.

**Table 1.** A list of tasks and models that are currently (as of version 2.3.0) implemented in the hBayesDM package.

| Task (alphabetical order)<br>As of version 2.3.0 | Required columns in a data file                                                                                                                                                                                                                                              | Model name                                                                                        | hBayesDM fuction                          | Number of<br>parameters<br>(per subject) | References                                                                          |
|--------------------------------------------------|------------------------------------------------------------------------------------------------------------------------------------------------------------------------------------------------------------------------------------------------------------------------------|---------------------------------------------------------------------------------------------------|-------------------------------------------|------------------------------------------|-------------------------------------------------------------------------------------|
| Delay Discounting                                | <b>subjID</b> : subject identifier<br><b>delay_later</b> : time delay of later option<br><b>amount_later</b> : amount of later option<br><b>delay_sooner</b> : time delay of sooner option<br><b>amount_later</b> : amount of sooner option<br><b>choice</b> : chosen option | Constant-Sensitivity<br>Exponential<br>Hyperbolic                                                 | dd_cs<br>dd_exp<br>dd_hyp                 | 3<br>2<br>2                              | Ebert & Prelec (2007)<br>Samuelson (1937)<br>Mazur (1987)                           |
| Iowa Gambling                                    | <b>subjID</b> : subject identifier<br><b>deck</b> : chosen deck (=1,2,3, or 4)<br><b>gain</b> : amount gained on each trial<br><b>loss</b> : amount lost on each trial                                                                                                       | Prospect Valence Learning-Decay/RI<br>Prospect Valence Learning-Delta<br>Value-Plus-Perseverance  | igt_pvl_decay<br>igt_pvl_delta<br>igt_vpp | 4<br>4<br>7                              | Ahn et al. (2011; 2014)<br>Ahn et al. (2008)<br>Worthy, Pang, & Byrne (2013)        |
| Orthogonalized Go/Nogo                           | <b>subjID</b> : subject identifier<br><b>cue</b> : cue number (=1,2,3, or 4)<br><b>keyPressed</b> : pressed (1) or not (0)<br><b>outcome</b> : outcome on each trial (= -1, 0, or 1)                                                                                         | RW+Noise<br>RW+Noise+Go Bias<br>RW+Noise+Go Bias+Pav. Bias<br>RW(rew/pun)+Noise+Go Bias+Pav. Bias | gng_m1<br>gng_m2<br>gng_m3<br>gng_m4      | 3<br>4<br>5<br>6                         | Guitart-Masip et al. (2012)<br>"<br>"<br>Cavanagh et al. (2013)                     |
| Probabilistic Reversal Learning                  | <b>subjID</b> : subject identifier<br><b>choice</b> : chosen option (=1 or 2)<br><b>outcome</b> : reward (1) or loss (-1) on each trial                                                                                                                                      | Experience-Weighted Attraction<br>Fictitious Update<br>Reward-Punishment                          | prl_ewa<br>prl_fictitious<br>prl_rlp      | 3<br>3<br>3                              | Ouden et al. (2013)<br>Glascher, Hampton, & O'Doherty (2009)<br>Ouden et al. (2013) |
| Risk-Aversion                                    | <b>subjID</b> : subject identifier<br><b>gain</b> : possible (50%) gain of risky option<br><b>loss</b> : possible (50%) loss of risky option<br><b>cert</b> : certain option<br><b>gamble</b> : gamble was taken (=1) or not (=0)                                            | Prospect Theory (PT)<br>PT without loss aversion (LA)<br>PT without risk aversion (RA)            | ra_prospect<br>ra_noLA<br>ra_noRA         | 3<br>2<br>2                              | Sokol-Hessner et al. (2009)<br>Tom et al. (2007)                                    |
| Two-Armed Bandit                                 | <b>subjID</b> : subject identifier<br><b>choice</b> : chosen option (=1 or 2)<br><b>outcome</b> : outcome on each trial                                                                                                                                                      | Rescorla-Wagner (delta)                                                                           | bandit2arm_delta                          | 2                                        | Erev et al. (2010)<br>Hertwig et al. (2004)                                         |
| Ultimatum Game                                   | <b>subjID</b> : subject identifier<br><b>offer</b> : offer made by proposer<br><b>accept</b> : accepted (1) or declined (0) by responder                                                                                                                                     | Ideal Bayesian Observer<br>Rescorla-Wagner (delta)                                                | ug_bayes<br>ug_delta                      | 3<br>3                                   | Xiang et al. (2013)<br>Gu et al. (2015)                                             |

The DDT has been widely studied in healthy populations (e.g., Green & Myerson, 2004; Kable & Glimcher, 2007) and DD has been associated with cognitive abilities such as intelligence (Shamosh et al., 2008) and working memory (Hinson, Jameson, & Whitney, 2003). Steeper delay discounting is a strong behavioral marker for addictive behaviors (Ahn & Vassileva, 2016; MacKillop, 2013) and has also been associated with other psychiatric conditions including schizophrenia (Ahn, Rass, Fridberg, Bishara, Forsyth, Breier, et al., 2011b; Heerey, Matveeva, & Gold, 2011; Heerey, Robinson, McMahon, & Gold, 2007) and bipolar disorder (Ahn, Rass, Fridberg, Bishara, Forsyth, Breier, et al., 2011b). The hBayesDM package currently contains three different models for the DDT:

- 1) `dd_cs` (Constant Sensitivity model, Ebert & Prelec, 2007)
  - Exponential discounting rate ( $0 < r < 1$ )
  - Impatience ( $0 < s < 10$ )
  - Inverse temperature ( $0 < \beta < 5$ )
- 2) `dd_exp` (Exponential model, Samuelson, 1937)
  - Exponential discounting rate ( $0 < r < 1$ )
  - Inverse temperature ( $0 < \beta < 5$ )
- 3) `dd_hyperbolic` (Hyperbolic model, Mazur, 1987)
  - Discounting rate ( $0 < k < 1$ )
  - Inverse temperature ( $0 < \beta < 5$ )

## 2.2. The Iowa Gambling task

The Iowa Gambling task (IGT, Bechara, Damasio, Damasio, & Anderson, 1994) was originally developed to assess decision-making deficits of patients with ventromedial prefrontal cortex lesions. On each trial, subjects are presented with four decks of cards. Two decks are advantageous (good) and the other two decks disadvantageous (bad) in terms of long-term gains. Subjects are instructed to choose decks that maximize long-term gains, which they are expected to learn by trial and error. From a statistical perspective, the IGT is a four-armed bandit problem.

The IGT has been used extensively to study decision-making in several psychiatric populations (Ahn et al., 2014; Bechara & Martin, 2004; Bechara et al., 2001; Bolla et al., 2003; Grant, Contoreggi, & London, 2000; Vassileva, Gonzalez, Bechara, & Martin, 2007). The hBayesDM package currently contains three different models for the IGT:

- 1) `igt_pvl_decay` (Ahn et al., 2014; Ahn, Krawitz, Kim, Busemeyer, & Brown, 2011a)
  - Decay rate ( $0 < A < 1$ )
  - Shape ( $0 < \alpha < 2$ )
  - Consistency ( $0 < c < 5$ )
  - Loss Aversion ( $0 < \lambda < 10$ )
- 2) `igt_pvl_delta` (Ahn, Busemeyer, Wagenmakers, & Stout, 2008)
  - Learning rate ( $0 < A < 1$ )
  - Shape ( $0 < \alpha < 2$ )
  - Consistency ( $0 < c < 5$ )
  - Loss Aversion ( $0 < \lambda < 10$ )
- 3) `igt_vpp` (Worthy, Pang, & Byrne, 2013)
  - Learning rate ( $0 < A < 1$ )
  - Shape ( $0 < \alpha < 2$ )
  - Consistency ( $0 < c < 5$ )
  - Loss Aversion ( $0 < \lambda < 10$ )
  - Perseverance gain impact ( $-1 < \epsilon_p < 1$ )
  - Perseverance loss impact ( $-1 < \epsilon_n < 1$ )
  - Perseverance decay rate ( $0 < k < 1$ )
  - Reinforcement learning weight ( $0 < \omega < 1$ )

### 2.3. The Orthogonalized Go/NoGo task

Preparatory Pavlovian control sets a strong prior on actions for predictors of outcomes depending on their valence: approaching/engaging behavior with appetitive outcomes and avoiding/inhibiting behavior with aversive outcomes. Instrumental control,



on the other hand, selects actions based on the action-outcome contingencies. The orthogonalized Go/NoGo (GNG) task (Guitart-Masip et al., 2012) is designed to examine the interaction between the two controllers by orthogonalizing the action requirement (Go vs. NoGo) against the valence of the outcome (winning vs. avoiding losing money).

Each trial of the orthogonal GNG task has three events in the following sequence: cue presentation, target detection, and outcome presentation. First, one of four cues is presented (“Go to win”, “Go to avoid (losing)”, “NoGo to win”, or “NoGo to avoid”). After some delay, a target (“circle”) is presented on the screen and subjects need to respond with either a *Go* (press a button) or *NoGo* (withhold the button press). Then, subjects receive a probabilistic (e.g., 80%) outcome. See Guitart-Masip et al. (2012) for more details of the experimental design.

The orthogonalized GNG task has been used to study decision-making in healthy populations (Cavanagh et al., 2013), age-related changes in midbrain structural integrity in older adults (Chowdhury, Guitart-Masip, Lambert, Dolan, & Duzel, 2013), and negative symptoms of schizophrenia (Albrecht, Waltz, Cavanagh, Frank, & Gold, 2016). The interaction between Pavlovian and instrumental controllers might also play a role in addiction problems (Guitart-Masip, Duzel, Dolan, & Dayan, 2014). The hBayesDM package currently contains four different models for the orthogonalized GNG task:

- 1) `gng_m1` (M1 in Guitart-Masip et al., 2012)
  - Lapse rate ( $0 < \xi < 1$ )
  - Learning rate ( $0 < \epsilon < 1$ )
  - Effective size of a reinforcement ( $0 < \rho < \infty$ )
- 2) `gng_m2` (M2 in Guitart-Masip et al., 2012)
  - Lapse rate ( $0 < \xi < 1$ )
  - Learning rate ( $0 < \epsilon < 1$ )
  - Go Bias ( $-\infty < b < \infty$ )
  - Effective size of a reinforcement ( $0 < \rho < \infty$ )
- 3) `gng_m3` (M3 in Guitart-Masip et al., 2012)
  - Lapse rate ( $0 < \xi < 1$ )

- Learning rate ( $0 < \epsilon < 1$ )
- Go Bias ( $-\infty < b < \infty$ )
- Pavlovian bias ( $-\infty < \pi < \infty$ )
- Effective size of a reinforcement ( $0 < \rho < \infty$ )
- 4) gng\_m4 (M5 in Cavanagh et al., 2013)
  - Lapse rate ( $0 < \xi < 1$ )
  - Learning rate ( $0 < \epsilon < 1$ )
  - Go Bias ( $-\infty < b < \infty$ )
  - Pavlovian bias ( $-\infty < \pi < \infty$ )
  - Effective size of reward reinforcement ( $0 < \rho_{rew} < \infty$ )
  - Effective size of punishment reinforcement ( $0 < \rho_{pun} < \infty$ )

## 2.4. Probabilistic Reversal Learning task

Environments often have higher-order structures such as interdependencies between stimuli, action, and outcomes. In such environments, subjects need to infer and make use of the structures to make optimal decisions. In the probabilistic reversal learning task (PRL), there exists an anticorrelation between the outcomes of two stimuli and the reward contingencies reverse unbeknownst to subjects. Subjects need to take the higher-order structure of the task into account to optimize their decision-making and maximize earnings.

In a typical probabilistic reversal learning (PRL) task, two stimuli are presented to a subject. The choice of a ‘correct’ or good stimulus will usually lead to a monetary gain (e.g., 70%) whereas the choice of an ‘incorrect’ or bad stimulus will usually lead to a monetary loss. The reward contingencies will reverse at fixed points (e.g., Murphy, Michael, Robbins, & Sahakian, 2003) or will be triggered by consecutive correct choices (Cools, Clark, Owen, & Robbins, 2002; Hampton, 2006).

The PRL task has been widely used to study reversal learning in healthy individuals (Cools et al., 2002; Gläscher et al., 2009; Ouden et al., 2013). The PRL has been also used to study decision-making deficits associated with prefrontal cortex lesions (e.g., Fellows & Farah, 2003; Rolls, Hornak, Wade, & McGrath, 1994) as well as

Parkinson's disease (e.g., Cools, Lewis, Clark, Barker, & Robbins, 2007; Swainson et al., 2000), schizophrenia (e.g., Waltz & Gold, 2007), and cocaine dependence (Ersche, Roiser, Robbins, & Sahakian, 2008). The hBayesDM package currently contains three models for probabilistic reversal learning tasks:

- 1) `prl_ewa` (Ouden et al., 2013)
  - 1 - Learning rate ( $0 < \varphi < 1$ )
  - Indecision point ( $0 < \rho < 1$ )
  - Inverse temperature ( $-10 < \beta < 10$ )
- 2) `prl_fictitious` (Gläscher et al., 2009)
  - Learning rate ( $0 < \eta < 1$ )
  - Indecision point ( $0 < \alpha < 1$ )
  - Inverse temperature ( $0 < \beta < 5$ )
- 3) `prl_rp` (Ouden et al., 2013)
  - Punishment learning rate ( $0 < A_{pun} < 1$ )
  - Reward learning rate ( $0 < A_{rew} < 1$ )
  - Inverse temperature ( $-10 < \beta < 10$ )

## 2.5. Risk Aversion task

The Risk Aversion (Sokol-Hessner, Camerer, & Phelps, 2012; RA; Sokol-Hessner et al., 2009) task is a description-based task (Hertwig et al., 2004) where possible outcomes of all options and their probabilities are provided to subjects on each trial. In the RA task, subjects choose either a sure option with a guaranteed amount or a risky option (i.e., gamble) with possible gains and/or loss amounts. Subjects are asked to choose which option they prefer (or whether they want to accept the gamble) on each trial. In the RA task, subjects performed two cognitive regulation conditions in a within-subject design: for the *Attend* and *Regulate (Reappraise)* conditions (see Sokol-Hessner et al., 2009 for the details). Users can fit data from each condition separately and examine the effect of cognitive regulation strategy. Data published in Sokol-Hessner et al. (2009) are available in the following paths:

```
path_to_attend_data=system.file("extdata/ra_data_attend.txt",
                                package="hBayesDM")

path_to_regulate_data=system.file("extdata/ra_data_reappraisal.tx
                                t", package="hBayesDM")
```

The hBayesDM package currently contains three models for the RA and similar (e.g., Tom, Fox, Trepel, & Poldrack, 2007) tasks:

- 1) **ra\_prospect** (Sokol-Hessner et al., 2009)
  - Loss aversion ( $0 < \lambda < 5$ )
  - Risk aversion ( $0 < \rho < 2$ )
  - Inverse temperature ( $0 < \tau < \infty$ )
- 2) **ra\_noLA** (no loss aversion (LA) parameter; for tasks that involve only gains)
  - Risk aversion ( $0 < \rho < 2$ )
  - Inverse temperature ( $0 < \tau < \infty$ )
- 3) **ra\_noRA** (no risk aversion (RA) parameter; e.g., Tom et al., 2007)
  - Loss aversion ( $0 < \lambda < 5$ )
  - Inverse temperature ( $0 < \tau < \infty$ )

## 2.6. Two-Armed Bandit task

Multi-armed bandit tasks or problems typically refer to situations in which gamblers decide which gamble or slot machine to play to maximize the long-term gain. Many reinforcement learning tasks and experience-based (Hertwig, Barron, Weber, & Erev, 2004) tasks can be classified as bandit problems. In a typical two-armed bandit task, subjects are presented with two options (stimuli) on each trial. Feedback is given after a stimulus is chosen. Subjects are asked to maximize positive feedback as they make choices, and they are expected to learn stimulus-outcome contingencies from trial-by-trial experience. The hBayesDM package currently contains a simple model for a two-armed bandit task:

1) `bandit2arm_delta` (Hertwig et al., 2004)

Learning rate ( $0 < A < 1$ )

Inverse temperature ( $0 < \tau < 5$ )

## 2.7. The Ultimatum Game (Norm-Training)

The ability to understand social norms of an environment and to adaptively cope with norms is critical for normal social functioning (Gu et al., 2015; Montague & Lohrenz, 2007). The Ultimatum Game (UG) is a widely used social decision-making task that examines how individuals respond to deviations from social norms and adapt to norms in a changing environment.

The UG involves two players: a Proposer and a Responder. On each trial, the Proposer is given some amount of money to divide up amongst the two players. After deciding how to divide the money, an offer is made to the Responder. The Responder can either accept the offer (money is split as offered), or reject it (both players receive nothing). Previous studies show that modal offers are approximately 50% of the total amount and “unfair” offers ( $< 20\%$  of the total amount) are often rejected although it is always optimal for a Responder to accept any offer (Güth, Schmittberger, & Schwarze, 1982; Sanfey, 2003; Thaler, 1988). A recent study examined the computational substrates of norm adjustment by using a norm-training UG where subjects played the role of Responder in a norm-changing environment (Xiang et al., 2013).

The UG has been used to investigate social decision-making of individuals with ventromedial prefrontal lesions (Gu et al., 2015; Koenigs et al., 2007) and insular cortex (Gu et al., 2015) lesions, and of patients with schizophrenia (Agay, Kron, Carmel, Mendlovic, & Levkovitz, 2008; Csukly, Polgár, Tombor, Réthelyi, & Kéri, 2011). The hBayesDM package currently contains two models for the UG (or norm-training UG):

1) `ug_bayes` (Xiang et al., 2013)

Envy ( $0 < \alpha < 20$ )

Guilt ( $0 < \beta < 10$ )

Inverse temperature ( $0 < \tau < 10$ )

2) `ug_delta` (Gu et al., 2015)

Envy ( $0 < \alpha < 1$ )

Inverse temperature ( $0 < \gamma < 1$ )

Norm adaptation rate ( $0 < \varepsilon < 1$ )

### 3. Mathematical formulation of hierarchical Bayesian models

We first briefly describe HBA (**Section 3.1**) for readers interested in HBA or a Bayesian framework in general. Then, we illustrate how we program our models using the Stan software package (Carpenter et al., 2016) (**Section 3.2**) and how we formulate hierarchical structures for various types of model parameters (**Section 3.3**). Readers who are not interested in mathematical details may skip **Sections 3.2** and **3.3**.

#### 3.1. Hierarchical Bayesian analysis (HBA)

Most computational models do not have closed form solutions and we need to estimate parameter values. Traditionally, parameters are estimated at the individual level with maximum likelihood estimation (MLE): getting point estimates that maximize the likelihood of data for each individual separately (e.g., Myung, 2003). However, individual MLE estimates are often noisy and unreliable especially when there is insufficient amount of data, which is common in psychology or neuroscience experimental settings (c.f., speeded choice-response time tasks). A group-level analysis (e.g., group-level MLE), which estimates a single set of parameters for the whole group of individuals, may generate more reliable estimates but inevitably ignores individual differences.

For parameter estimation, the hBayesDM package uses HBA, which is a branch of Bayesian statistics. We will briefly explain why hierarchical approaches such as HBA have advantages over traditional MLE methods. In Bayesian statistics, we assume prior beliefs (i.e., prior distributions) for model parameters and update the priors into posterior distributions given the data (e.g., trial-by-trial choices and outcomes) using Bayes' rule. If Bayesian inference is performed individually for each individual  $i$ :

$$P(\Theta_i | D_i) = \frac{P(D_i | \Theta_i)P(\Theta_i)}{P(D_i)} = \frac{P(D_i | \Theta_i)P(\Theta_i)}{\int P(D_i | \Theta_{i'})P(\Theta_{i'})d\Theta_{i'}}$$

Here,  $\Theta_i$  is a set of parameters of a model for individual  $i$  (e.g.,  $\Theta_i = \{\alpha_i, \beta_i, \gamma_i, \dots\}$ ),  $D_i$  is the data,  $p(D_i | \theta)$  is the likelihood (of data given a set of parameters),  $P(D_i)$  is called evidence (of data being generated by this model), and  $P(\Theta_i)$  and  $P(\Theta_i | D_i)$  are prior and posterior distributions of  $\Theta_i$ , respectively.

In HBA, hyper-parameters are introduced on top of individual parameters as illustrated in **Figure 1A** (Gelman, Dunson, & Vehtari, 2013; Kruschke, 2014). If we set hyper-parameters as  $\Phi = \{\mu_\alpha, \mu_\beta, \mu_\gamma, \sigma_\alpha, \sigma_\beta, \sigma_\gamma, \dots\}$  with group-level normal means  $\mu_{(\cdot)}$  and standard deviations  $\sigma_{(\cdot)}$ , the joint posterior distribution  $P(\Theta, \Phi | D)$  is:

$$P(\Theta, \Phi | D) = \frac{P(D | \Theta, \Phi)P(\Theta, \Phi)}{P(D)} \propto P(D | \Theta)P(\Theta | \Phi)P(\Phi)$$

The hierarchical structure of HBA leads to “shrinkage” effects (Gelman et al., 2013) in individual estimates. Shrinkage effects refer to, put simply, when each individual’s estimates inform the group’s estimates, which in turn inform the estimates of all individuals. Consequently, individual parameter estimates tend to be more stable and reliable because commonalities among individuals are captured and informed by the group tendencies (but see **Section 6** for its limitations and potential drawbacks). Such a hierarchical approach is particularly useful when the amount of information (e.g., number of trials) from a single person is often too small to precisely estimate parameters at the individual level. A simulation study (Ahn, Krawitz, Kim, Busemeyer, & Brown, 2011a) empirically demonstrated that HBA outperforms individual MLE in parameter recovery (see **Figure 1B**), which suggests that parameter values estimated with HBA might more accurately reflect individual differences underlying neurocognitive processes than those estimated with individual MLE. Importantly, HBA provides full posterior distributions

instead of point estimates, thus it provides rich information about the parameters. HBA also makes it straightforward to make group comparisons in a Bayesian fashion (e.g., comparing clinical and non-clinical groups, see an example in **Section 5.4.4**). Recent studies in cognitive and decision sciences further confirmed the validity and usefulness of HBA and other hierarchical approaches (e.g., Ahn et al., 2014; Guitart-Masip et al., 2012; Huys et al., 2011; Katahira, 2016; Lee, 2011; Raja Beharelle, Polania, Hare, & Ruff, 2015; Shiffrin, Lee, Kim, & Wagenmakers, 2008).

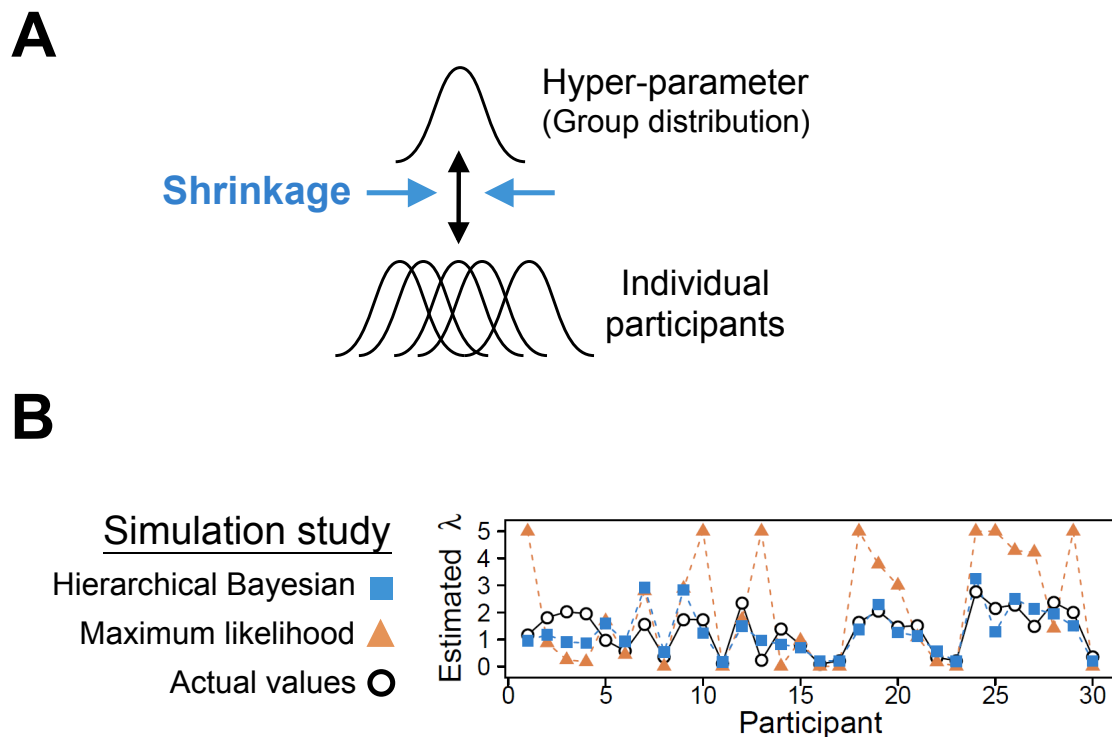

**Figure 1. (A)** A schematic illustration of hierarchical Bayesian analysis (HBA). In this example, individual parameters are assumed to come from a hyper (group) parameter. **(B)** The results of a parameter recovery study (Ahn et al., 2011) between HBA and maximum likelihood estimation (MLE). Thirty subjects' data on the IGT were simulated from true parameters (black circles) and parameters were estimated with hierarchical Bayesian analysis (blue squares) and individual maximum likelihood estimation (red triangles). Performance of the two approaches is shown for the loss aversion parameter ( $\lambda$ ).

In the hBayesDM package, posterior inference for all models is performed with a Markov Chain Monte Carlo (MCMC) sampling scheme using a newly developed probabilistic programming language Stan (Carpenter et al., 2016) and its R instantiation



RStan (<http://mc-stan.org/interfaces/rstan>). Stan uses a specific MCMC sampler called Hamiltonian Monte Carlo (HMC) to perform sampling from the posterior distribution. HMC offers more efficient sampling than conventional algorithms implemented in other software like BUGS (Lunn, Thomas, Best, & Spiegelhalter, 2000; Lunn, Spiegelhalter, Thomas, & Best, 2009) and JAGS (Plummer, 2003). Moreover, HMC works well even for complex models with high-dimensional model structures and highly correlated model parameters. See the Stan reference manual (<http://mc-stan.org/documentation/>) and Kruschke (2014; Chapter 14) for a comprehensive description of HMC and Stan. To learn more about the basic foundations of MCMC, see Kruschke (2014; Chapter 7).

## 4. Performing hierarchical Bayesian analysis with Stan

To use the hBayesDM package, users do not need to know how to program in Stan. However, for those interested in understanding our models and Stan in general, we briefly introduce the general structure of model specification in Stan, followed by a detailed hierarchical parameter declaration and optimizing approaches that are utilized in hBayesDM. Lastly, we describe how we calculate log likelihood and model-fits inside Stan models.

### 4.1. General structure of Stan model specification

Many useful features of BUGS were incorporated into Stan's design; thus, Stan is similar to BUGS (or JAGS) and users familiar with BUGS would find Stan relatively easy to use (see Stan reference manual, Appendix B: <http://mc-stan.org/documentation/>). There are six model blocks in the general structure of Stan model specification, as listed below. Note that Stan implements sequential execution in its model specification unlike BUGS and JAGS where the order of code does not affect a model's execution:

```
data {
  ... read in external data...
}
```

```
transformed data {
... pre-processing of data ...
}
parameters {
... parameters to be sampled by HMC ...
}
transformed parameters {
... pre-processing of parameters ...
}
model {
... statistical/cognitive model ...
}
generated quantities {
... post-processing of the model ...
}
```

Note that the data, parameters and model blocks are mandatory in Stan, whereas transformed data, transformed parameters and generated quantities blocks are optional. Nonetheless, we typically use all these optional blocks in hBayesDM for different purposes: (1) We use the transformed data block to maintain a concise programming style and assign initial values. (2) We implement non-centered parameterization (a.k.a., Matt Trick) in the transformed parameters block to optimize sampling and reduce the autocorrelation between group-level parameters in our hierarchical models. Details will be explained in the optimizing section of the tutorial (**Section 4.3**). (3) We include the generated quantities section to explicitly calculate log-likelihood of the corresponding model and compute out-of-sample prediction accuracy (see **Section 4.4**) for model comparison.

## 4.2. Hierarchical parameter declaration in Stan

When declaring hierarchical parameters in hBayesDM with Stan, we assume that individual parameters are drawn from group-level normal distributions. Normal and half-Cauchy distributions are used for the priors of the group-level normal means ( $\mu_{(j)}$ ) and standard deviations ( $\sigma_{(j)}$ ), respectively. We employ weakly informative priors (Gelman et al., 2013) so that those priors will not bias the posterior distribution when sample sizes are small. According to the range of parameters of interest, we introduce four ways of

declaring hierarchical parameters: unbounded parameters, positive parameters, parameters bounded between 0 and 1, and parameters bounded between 0 and an upper limit  $U$ .

For unbounded parameters (say  $\xi$  for a general individual parameter for illustration purposes), we declare:

$$\mu_{\xi} \sim \text{Normal}(0, 1)$$

$$\sigma_{\xi} \sim \text{Cauchy}(0, 5)$$

$$\xi \sim \text{Normal}(\mu_{\xi}, \sigma_{\xi})$$

where  $\mu_{\xi}$  (group mean parameter) is drawn from a unit normal distribution,  $\sigma_{\xi}$  (group standard deviation parameter) is drawn from a positive-half Cauchy distribution, and  $\xi$  is distributed as a normal distribution with a mean of  $\mu_{\xi}$  and a standard deviation of  $\sigma_{\xi}$ .

For positive parameters (e.g., the effective size of reinforcements in the orthogonalized GNG task), we apply exponential transformation to constrain an unbounded parameter to be greater than 0:

$$\mu_{\xi'} \sim \text{Normal}(0, 1)$$

$$\sigma_{\xi'} \sim \text{Cauchy}(0, 5)$$

$$\xi' \sim \text{Normal}(\mu_{\xi'}, \sigma_{\xi'})$$

$$\xi = \exp(\xi')$$

For parameters that are bounded between 0 and 1 (e.g., learning rate), we use the inverse probit transformation (the cumulative distribution function of a unit normal distribution). In particular, Stan provides a fast approximation of the inverse probit transformation (i.e., `Phi_approx` function), which we adopted:

$$\begin{aligned}\mu_{\xi'} &\sim \text{Normal}(0, 1) \\ \sigma_{\xi'} &\sim \text{Cauchy}(0, 5) \\ \xi' &\sim \text{Normal}(\mu_{\xi'}, \sigma_{\xi'}) \\ \xi &= \text{Probit}^{-1}(\xi')\end{aligned}$$

For parameters that are bounded between 0 and an upper limit  $U$  (e.g., inverse Softmax temperature, loss aversion in the Risk-Aversion task), we simply adapt the declaration rule for  $[0, 1]$  parameters and multiply it by the upper limit  $U$ . Formally, we declare:

$$\begin{aligned}\mu_{\xi'} &\sim \text{Normal}(0, 1) \\ \sigma_{\xi'} &\sim \text{Cauchy}(0, 5) \\ \xi' &\sim \text{Normal}(\mu_{\xi'}, \sigma_{\xi'}) \\ \xi &= \text{Probit}^{-1}(\xi') \cdot U\end{aligned}$$

As shown above, we do not employ truncated sampling in declaring hierarchical parameters because hard constrain (e.g.,  $\xi \sim \text{Normal}(0, 1)T[0, U]$ ) may harm the HMC sampling algorithm and return poorly converged posterior distributions.

### 4.3. Optimizing approaches in Stan

Hierarchical models often suffer from highly correlated group-level parameters in posterior distributions, creating challenges in terms of model convergence and estimation time (Gelman et al., 2013; Kruschke, 2014). In order to address the challenges, we practice reparameterization and vectorization to optimize the model specification in hBayesDM.

A normal( $\mu, \sigma$ ) distribution, like other distributions in the location-scale distribution family, can be reparameterized to be sampled from a unit normal distribution

that is multiplied by the scale parameter  $\sigma$  and then shifted with the location parameter  $\mu$ . Formally,

$$\xi \sim \text{Normal}(\mu_{\xi}, \sigma_{\xi})$$

is mathematically equivalent to

$$\xi' \sim \text{Normal}(0, 1)$$

$$\xi = \mu_{\xi} + \xi' \cdot \sigma_{\xi}$$

Such transformation is referred to as the non-centered parameterization (a.k.a., Matt Trick) by the Stan Development Team (2016), and it effectively reduces the dependence between  $\mu_{\xi}$ ,  $\xi$ , and  $\sigma_{\xi}$  and increases effective sample size.

In addition to reparameterization, we use vectorization to improve MCMC sampling. For example, suppose one experiment consists of  $N$  participants, then its individual level parameter  $\xi$  is an  $N$ -dimensional vector. Instead of declaring  $\xi$  as:

for (n in 1: N)

$$\xi[n] \sim \text{Normal}(\mu_{\xi}, \sigma_{\xi})$$

we vectorize it as:

$$\xi \sim \text{Normal}(\mu_{\xi}, \sigma_{\xi})$$

to make full use of Stan's vectorization of all sampling statements. As a rule of thumb, one may want to use vectorization as long as it is possible. All hBayesDM's models that implement both reparameterization and vectorization can be found under the directory of `... \R\R-x.x.x\library\hBayesDM\stan`, or the path can be retrieved by calling

the following R command: `file.path(.libPaths(), "hBayesDM", "stan")`. Those interested in more details of optimizing Stan models can read Stan reference manual (<http://mc-stan.org/documentation/>, “Optimizing Stan Code” Chapter).

#### 4.4. Computing log-likelihood inside Stan models

The hBayesDM package provides two model performance indices including Leave-One-Out Information Criterion (LOOIC) and Widely Applicable Information Criterion (WAIC). We follow Vehtari et al. (2016) to compute and monitor Stan’s pointwise log-likelihood in the generated quantities block. The generated quantities block serves as the post-processing of the model, with its commands being executed only after the HMC sampling. Therefore, it does not significantly increase time required for Bayesian inference. The generated quantities block is particularly useful when users intend to monitor pointwise log-likelihood (Vehtari, Gelman, & Gabry, 2016), reproduce predictive values or obtain internal model variables. Practically, we initialize the pointwise log-likelihood to be 0 for each participant, then we repeat the same model of the ‘model’ block in the generated quantities block, except we replace the sampling statement with the explicit computation of pointwise log-likelihood. Please be aware that in many RLDM tasks (especially RL tasks), choices on one trial are dependent on those on other trials. Therefore, instead of gathering the trial-by-trial log-likelihood, we sum them over per participant and obtain the pointwise log-likelihood at the participant level. Below is the pseudocode as an example of what is described above:

```
model {
...
  for (i in 1:N) {
    for (t in 1:T) {
      Choice[i, t] ~ categorical_logit(ev);
    }
  }

Generated quantities {
...
  for (i in 1:N) {
    log_lik[i]=0;
    for (t in 1:T) {
```

```
log_lik[i]=log_lik[i] + categorical_logit_lpmf(Choice[i, t] | ev);
...
}
```

Once having the pointwise log-likelihood per participant, it is straightforward to compute LOOIC and WAIC (Vehtari et al., 2016). Both LOOIC and WAIC provide the estimate of out-of-sample predictive accuracy in a fully Bayesian way, which samples new participants from the hierarchical group, generates new data from those new participants and evaluates how well a model make predictions on the new data set. What makes LOOIC and WAIC more reliable compared to Akaike information criterion (AIC; Akaike, 1987; Bozdogan, 1987) and deviance information criterion (DIC; Spiegelhalter, Best, Carlin, & van der Linde, 2002) is that both LOOIC and WAIC use the pointwise log-likelihood of the full Bayesian posterior distribution, whereas AIC and DIC are based only on point estimates to calculate model evidence. We used functions included in the loo package (Vehtari et al., 2016) to generate LOOIC and WAIC values. Both LOOIC and WAIC are on the information criterion scale; thus lower values of LOOIC or WAIC indicate better out-of-sample prediction accuracy of the candidate model.

## 5. Step-by-step tutorials of the hBayesDM package

### 5.1. Installing *hBayesDM*: Prerequisites

Before installing hBayesDM, it is necessary to have an up to date version of R (version 3.2.0 or later is recommended) and RStan on your machine. RStudio ([www.rstudio.com](http://www.rstudio.com)) is not required but strongly recommended. Typically RStan can be installed just by entering the following command into the R console:

```
install.packages("rstan", dependencies = TRUE)
```

For Windows, it is necessary to install *Rtools* before installing RStan. Instructions for installing Rtools on a Windows machine can be found in this link (<https://github.com/stan-dev/rstan/wiki/Install-Rtools-for-Windows>).

After RStan (and Rtools for Windows users) is installed, it is recommended to test the installation before moving on to install hBayesDM. This can be accomplished by trying to fit the “Eight Schools” example that is provided on RStan’s *Getting Started* page (<https://github.com/stan-dev/rstan/wiki/RStan-Getting-Started>).

## 5.2. Installing *hBayesDM*

The hBayesDM package is available on the Comprehensive R Archive Network (CRAN). Each software package that is submitted to CRAN undergoes daily checks to ensure that the package is functional and without major bugs. CRAN also makes it very simple to install a package, so this is the preferred method for installation. To install hBayesDM from CRAN, use the following call:

```
install.packages("hBayesDM", dependencies=TRUE)
```

## 5.3. How to use hBayesDM: Navigating

After hBayesDM has been installed correctly, the package must be loaded into the current environment. Users will be able to access all of the functions that are included with the package after hBayesDM is loaded. To load hBayesDM, use the following command:

```
library(hBayesDM)
```



After loading the package, users should see a message that displays the version number of the current hBayesDM install. For a list of all the models available in the package, one can refer to the package help files with the following command:

```
?hBayesDM
```

This will bring up a help file that contains a general description of the package along with a list of all RLDM tasks and models that can be fit with hBayesDM. One can follow the links provided in the help file to find in-depth documentation describing how to fit each model.

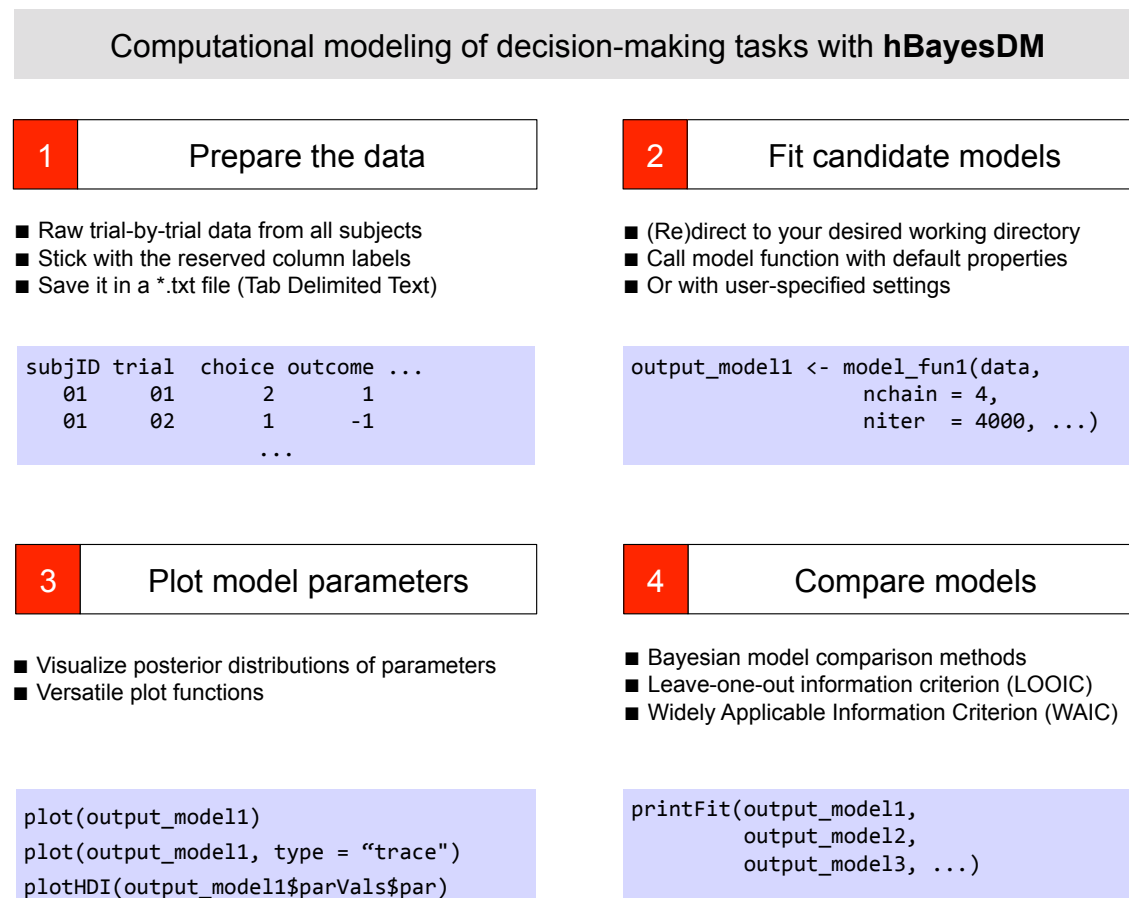

**Figure 2.** Four steps of doing HBA with the hBayesDM package.

## 5.4. How to use hBayesDM: Model Fitting

The four steps of doing HBA with hBayesDM are illustrated graphically in **Figure 2**. These steps are described in further detail below. To exemplify these steps, four models of the orthogonalized GNG task are fit and compared using the hBayesDM package.

### 5.4.1. Prepare the data

To begin, all subjects' data (for the current analysis) should be combined into a single text (\*.txt) file where rows represent trial-by-trial observations and columns represent variables of interest. The first row of the text file must contain the column headers (names) of the variables of interest.

Subjects' data must contain variable headers that are consistent with the column names specified in the model help file (see **Table 1**). For example, in the orthogonalized GNG task, there should exist columns labeled: "subjID", "cue", "keyPressed", and "outcome", where subjID is a subject-specific identifier, cue is a nominal integer specifying the cue shown on the given trial, keyPressed is a binary value representing whether or not a key was (1) or was not (0) pressed on the given trial, and outcome represents a positive (1), negative (-1), or neutral (0) outcome on the given trial. The text file may also contain other data/column headers, but only the aforementioned variables will be used for modeling analysis. All of the above information for each model can be found in the package help files, which can be accessed with R's help command (e.g., for orthogonalized GNG model 1: `?gng_m1`). Across all of the models implemented in hBayesDM, the number of trials within the data file is allowed to vary across subjects, but there should exist no N/A data. If some trials contain N/A data (e.g., `outcome=NA`), remove these trials before continuing.

Sample data can be retrieved from the package folder with the R command shown below. Note that the file name of sample (example) data for a given task is **taskName\_exampleData.txt** (e.g., `dd_exampleData.txt`, `igt_exampleData.txt`, `gng_exampleData.txt`, etc.):

```
dataPath = system.file("extdata/gng_exampleData.txt",
                        package="hBayesDM")
gng_data = read.table(dataPath, header=TRUE)
```

If data are downloaded from an external source to `"/home/user1/Downloads"`, the user may specify the path using a character string like below:

```
dataPath = "/home/user1/Downloads/gng_exampleData.txt"
```

### 5.4.2. Fit candidate models

Since hBayesDM uses MCMC sampling to generate posterior distributions, there are many arguments that may be passed to Stan through the model functions in order to fine-tune the sampling behavior. There are also arguments that can be used for user convenience. **Table 2** shows arguments that are common to all model functions in hBayesDM. Note that in the table an asterisk (\*) denotes an argument that may unpredictably change the computation time and/or sampling behavior of the MCMC chains (Homan & Gelman, 2014). For this reason, it is advised that only advanced users alter the default values of these arguments.

Below, the `gng_m1` model is fit using the sample data that comes with the package. The command indicates that three MCMC chains are to be run and three cores are to be used for parallel computing. Note that parallel computing is only useful for multiple chains; it is common to use one core per chain to maximize sampling efficiency. If `"example"` is entered as an argument for `data`, hBayesDM will use the sample data for the task. Convenience arguments such as `saveDir` can be used in order to save the resulting model output to a local directory. This is useful for when model fitting is expected to take long periods of time and users want to ensure that the data are saved. Also, the `email` argument allows users to be notified by an email message upon the completion of model fitting.

**Table 2.** A list of input arguments common to all model functions in the hBayesDM package

| Argument                    | Required from User     | Description                                                                                                     |
|-----------------------------|------------------------|-----------------------------------------------------------------------------------------------------------------|
| <code>data</code>           | Yes (default="choose") | Full path to text file containing data to be used for analysis                                                  |
| <code>niter</code>          | No (default=1)         | Number of (accepted) samples to be generated by Stan's HMC sampler                                              |
| <code>nwarmup</code>        | No (default=1)         | Number of (accepted) samples to be discarded from the beginning of the sampling procedure                       |
| <code>ncore</code>          | No (default=1)         | Number of CPUs to use for parallel computing                                                                    |
| <code>nchain</code>         | No (default=1)         | Number of MCMC chains to run                                                                                    |
| <code>nthin</code>          | No (default=1)         | Every $n^{th}$ (accepted) sample from the sampling procedure will be saved. All other samples will be discarded |
| <code>inits</code>          | No (default="random")  | Initial values for the HMC sampler                                                                              |
| <code>indPars</code>        | No (default="mean")    | How to summarize the parameters upon completion (mean, median, or mode)                                         |
| <code>saveDir</code>        | No (default=NULL)      | Path to directory where hBayesDM object should be saved upon completion                                         |
| <code>email</code>          | No (default=NULL)      | Email address that will be sent a message upon sampling completion                                              |
| <code>modelRegressor</code> | No (default=FALSE)     | Exporting model-based regressors? TRUE or FALSE                                                                 |
| <code>*adapt_delta</code>   | No (default=0.8)       | Acceptance probability of the HMC sampler                                                                       |
| <code>*stepsize</code>      | No (default=1)         | Size of each leapfrog step that the MCMC sampler can take on each new iteration.                                |
| <code>*max_treedepth</code> | No (default=10)        | Number of leapfrog steps that the MCMC sampler can take on each new iteration.                                  |

```
output1 = gng_m1(data="example", niter=5000, nwarmup=2000,
                 nchain=3, ncore=3, saveDir="/data/Models",
                 email="email@gmail.com")
```

A model function has default values for all arguments except for `data`, so the above command is equivalent (aside from `saveDir` and `email` arguments) to the more concise call below:

```
output1 = gng_m1("example", nchain=3, ncore=3)
```

If the `data` argument is left blank, a file browser window will appear, allowing the user to manually select the text file with their file browser. The default input arguments for each model were selected based on our experience with the sampling behavior of each model with respect to the data we have access to. For each model being fitted, `niter` and `nwarmup` values (and control parameters for advanced users) might need to be experimented with to ensure that convergence to target posterior distributions is being reached. Later sections will discuss convergence in more detail.

Executing any model function command in `hBayesDM` will generate messages for the user within the R console, exemplified by **Figure 3A**. It will take approximately 2 to 3 minutes (with the `gng_m1` model & "example" data) for the model fitting to complete. Note that you may get warning messages about “numerical problems” or that there are a certain number of “divergent transitions after warm-up”. When we check our models with example datasets, warning messages appear mostly at the beginning of the warm-up period, and there are very few divergent transitions after warm-up. In such cases, the warnings can be ignored. For a technical description of these (and other) sampling issues, see Appendix D of the Stan Reference Manual. When the model fitting is completed, the R console will print the message in **Figure 3B**. The output data will be stored in `output1`, a class `hBayesDM` object containing a list with 6 following elements:

```

A
Details:
# of chains                = 3
# of cores used            = 3
# of MCMC samples (per chain) = 5000
# of burn-in samples      = 2000
# of subjects              = 10
# of (max) trials per subject = 240

*****
** Building a model. Please wait. **
*****
starting worker pid=75130 on localhost:11950 at 08:25:48.905
starting worker pid=75138 on localhost:11950 at 08:25:49.101

SAMPLING FOR MODEL 'gng_m1' NOW (CHAIN 1).

Chain 1, Iteration:    1 / 5000 [  0%] (Warmup)
SAMPLING FOR MODEL 'gng_m1' NOW (CHAIN 2).
...

B
*****
**** Model fitting is complete! ****
*****

C
R> output1$allIndPars
      xi      ep      rho subjID
1 0.03688558 0.1397615 5.902901     1
2 0.02934812 0.1653435 6.066120     2
3 0.04467025 0.1268796 5.898099     3
4 0.02103926 0.1499842 6.185020     4
5 0.02620808 0.1498962 6.081908     5
...

D
R> output1$fit
Inference for Stan model: gng_m1.
3 chains, each with iter=5000; warmup=2000; thin=1;
post-warmup draws per chain=3000, total post-warmup draws=9000.

      mean se_mean  sd  2.5%  25%  50%  75%  97.5% n_eff Rhat
mu_xi    0.03    0.00 0.02   0.00   0.02   0.03   0.05   0.08  2316 1.00
mu_ep    0.15    0.00 0.02   0.11   0.13   0.15   0.16   0.19  4402 1.00
mu_rho    5.97    0.01 0.72   4.76   5.45   5.89   6.40   7.61  3821 1.00
sigma[1]  0.54    0.06 1.02   0.02   0.18   0.35   0.61   1.99   318 1.01
sigma[2]  0.12    0.00 0.08   0.01   0.05   0.10   0.16   0.31  2620 1.00
sigma[3]  0.12    0.00 0.09   0.01   0.05   0.10   0.16   0.33  2402 1.00
...

```

**Figure 3.** Panel (A) shows the message displayed in the R console after a model function is called. Here, “Details” shows information relevant to both the arguments passed to the function and to the data that was specified by the user. The console also shows the progression of the MCMC sampling. As shown in Panel (B), upon the completion of model fitting, a message is presented to the user. Panel (C) and (D) show that users can retrieve the summary statistics of individual model parameters and Stan model fits (the Stan fit object stored as `output1`).

1. model:

Name of the fitted model (i.e., `output1$model` is "gng\_m1")

2. `allIndPars`:  
Summary of individual subjects' parameters (default: posterior *mean values of individual parameters*). Users can also choose to use posterior *median* or *mode* in a model function command (e.g., `indPars="mode"`). See **Figure 3C** to view the values of `allIndPars` for `gng_m1` printed to the R console.
3. `parVals`:  
Posterior MCMC samples of all parameters. Note that hyper (group) posterior mean parameters are indicated by `mu_PARAMETER` (e.g., `mu_xi`, `mu_ep`, `mu_rho`). These values are extracted from `fit` with RStan's `extract()` function.
4. `fit`:  
An `rstan` object that is the output of RStan's `stan()` function. If users would like to use Rstan commands, they should be performed on this object. See **Figure 3D** for a summary of `fit` printed to the R console.
5. `rawdata`:  
Raw trial-by-trial data used for HBA. Raw data are provided in the output to allow users to easily access data and compare trial-by-trial model-based regressors (e.g., prediction errors) with choice data.
6. `modelRegressor` (optional):  
Trial-by-trial model-based regressor such as prediction errors, the value of the chosen option, etc. For each model, we pre-selected appropriate model-based regressors. Users can refer to the package help files for the details. Currently (version 2.3.0), this feature is available only for the orthogonalized GNG task.

### 5.4.3. Plot model parameters

It is important to both visually and quantitatively diagnose MCMC performance (i.e., visually check whether MCMC samples are well mixed and converged to stationary distributions). For the visual diagnostics of hyper (group) parameters, users can call `plot.hBayesDM()` or just `plot()`, which searches for an extension function that contains the class name. The class of any `hBayesDM` output is `hBayesDM`. For a quantitative check on convergence, the Gelman-Rubin convergence diagnostic (Gelman & Rubin, 1992) for each parameter is computed by RStan and stored in the `fit` element of the `hBayesDM` model output. To see the Gelman-Rubin values, refer to **Figure 3D**. Here,  $\hat{R}$  ( $\hat{R}_{\text{hat}}$ ) is the Gelman-Rubin index used to assess the convergence of the MCMC samples.  $\hat{R}$  values close to 1.00 would indicate that the MCMC chains are

converged to stationary target distributions. For all models included in hBayesDM,  $\hat{R}$  values are 1.00 for most parameters or at most 1.04 when tested on example datasets.

Users can also use trace plots to visually check MCMC samples. The command shown below (with font size set to 11) shows how to use the `plot()` command to create trace plots of hyper (group) parameters (see **Figure 4A** for an example):

```
plot(output1, type="trace", fontSize=11)
```

The trace plots indicate that the MCMC samples are indeed well mixed and converged, which is consistent with their  $\hat{R}$  values. Note that the plots in **Figure 4A** exclude burn-in samples. Users can include burn-in (warm-up) MCMC samples to better understand sampling behavior if necessary. The following function call produces the plot in **Figure 4B** that includes burn-in samples:

```
plot(output1, type="trace", inc_warmup=T)
```

Users can also plot the posterior distributions of the hyper (group) parameters with the default `plot()` function by not specifying the `type` argument. The following function call produces the plot in **Figure 4C**.

```
plot(output1)
```

To visualize individual parameters, users can use RStan's native functions as exemplified below. The following call plots each individual's  $\epsilon$  (learning rate) parameter (see **Figure 4D**):

```
stan_plot(output1$fit, "ep", show_density=T)
```



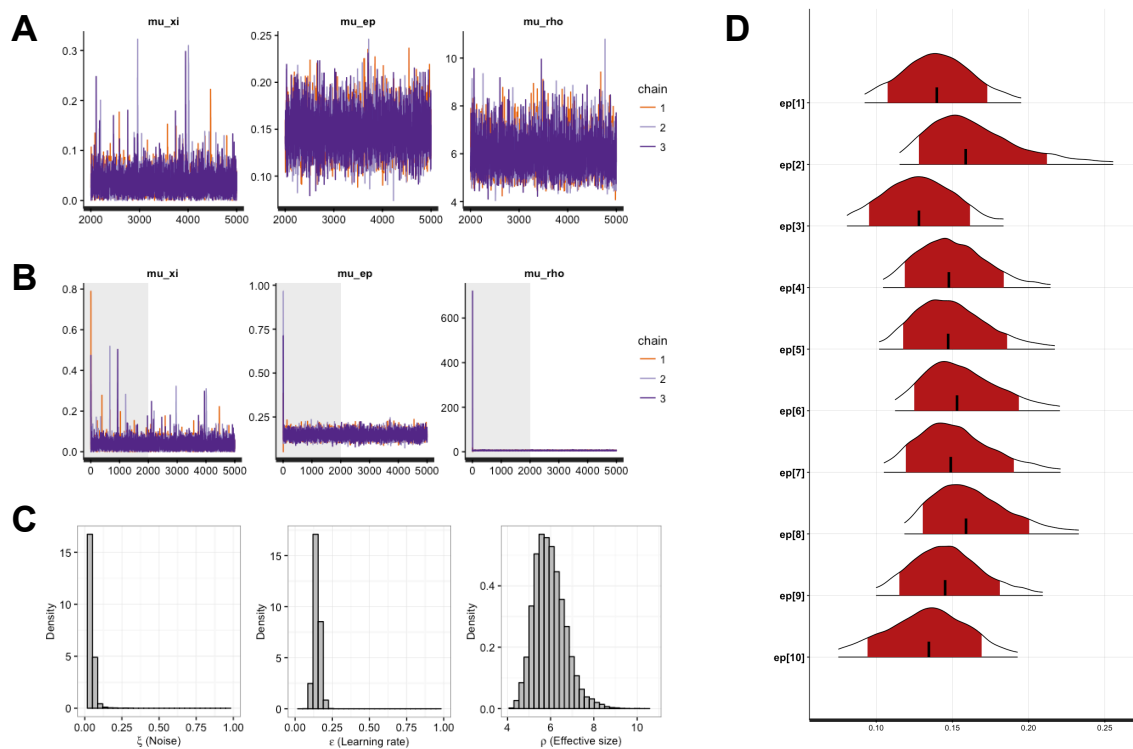

**Figure 4.** (A) Traceplots for the group-level (hyper) parameters of the `gng_m1` model. The 3 chains show excellent mixing, suggesting that they have converged to their target distributions. (B) The same traceplots as Panel (A), however, these also include the warm-up (burn-in) samples, highlighted by the gray background shading. (C) The posterior distributions of the group-level (hyper) parameters. (D) Individual-level posterior distributions. The red shading and tailed white areas represent the 80% and 95% kernel density estimates, respectively. Note that all plots above are generated directly from `hBayesDM` and `RStan` functions, with no further modifications.

#### 5.4.4. Compare models (and groups)

To compare multiple models using LOOIC or WAIC values, the first step is to fit all models in the same manner as the `gng_m1` example above. The following commands will fit the rest of the orthogonalized Go/Nogo models available within `hBayesDM`:

```
output2 = gng_m2("example", nchain=3, ncore=3)
output3 = gng_m3("example", nchain=3, ncore=3)
output4 = gng_m4("example", nchain=3, ncore=3)
```

Note that each model should be checked for convergence in the same manner as `gng_m1`. If for any reason a model fails to converge, re-fit the model or exclude the model from model comparisons.

Next, users can assess model fits using the `printFit()` command, which is a convenient way to summarize LOOIC and WAIC of all considered models. Assuming all four models' outputs are named `output1` (`gng_m1`), `output2` (`gng_m2`), `output3` (`gng_m3`), and `output4` (`gng_m4`), their model fits can be simultaneously summarized by the following command, the results of which are illustrated in **Figure 5A**:

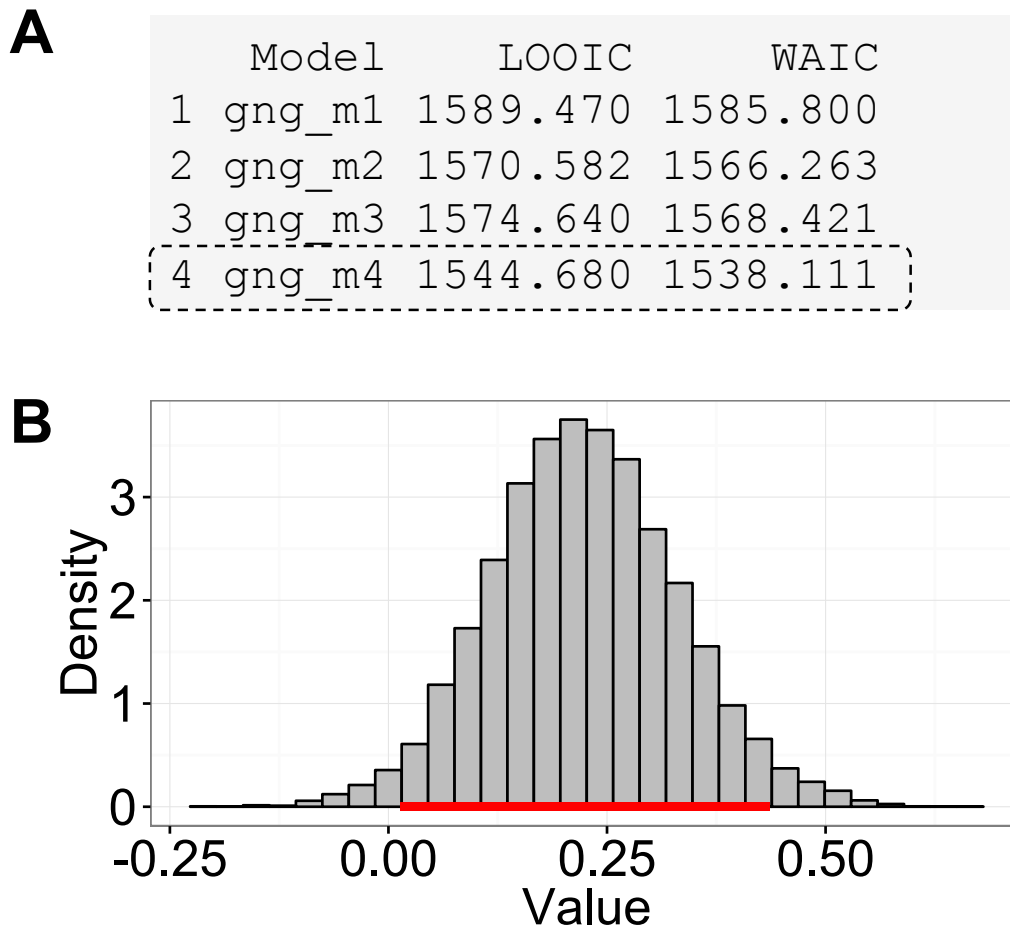

**Figure 5.** (A) An output of the `printFit()` command, which prints model performance indices (LOOIC and WAIC) of competing model(s). The resulting table shows the name

of each model, followed by their LOOIC and WAIC values. Lower LOOIC and WAIC values correspond to better model performance. Here, `gng_m4` (highlighted with a dashed box) has the lowest values. **(B)** The result of the `plotHDI()` function that plots the 95% Highest Density Interval (HDI) of the posterior distribution difference between two group parameters. The red bar indicates the 95% HDI. The 95% HDI excludes zero, which indicates that the two groups are credibly different from one another.

```
printFit(output1, output2, output3, output4)
```

The lower LOOIC or WAIC values indicate better model performance; thus, the model number 4 has the best LOOIC and WAIC compared to other models. Users interested in more detailed information including standard errors and expected log pointwise predictive density (elpd) can use the `extract_ic()` function (e.g., `extract_ic(output3)`) to extract this information. Note that the `extract_ic()` function can be used only for a single model output, unlike `printFit()`.

Note that there exist other model comparison methods including the simulation method (a.k.a., absolute model performance) (Ahn et al., 2008; 2014; Guitart-Masip et al., 2012; Steingroever, Wetzels, & Wagenmakers, 2013), parameter recovery (Ahn et al., 2014; Ahn, Krawitz, Kim, Busemeyer, & Brown, 2011a), and generalization criterion (Ahn et al., 2008; Busemeyer & Wang, 2000). Models that show the best goodness-of-fit may not perform well on other indices (e.g., Ahn et al., 2014), so it is recommended that researchers use multiple model comparison methods if at all possible.

#### 5.4.5. Group comparisons

Having selected the best-fit model, users may want to use the model to compare the parameter estimates of different populations. With a hierarchical Bayesian framework, users can compare model parameters of multiple groups or within-subject conditions in fully Bayesian ways (e.g., Ahn et al., 2014; Chan et al., 2014; Fridberg, Ahn, Kim, Bishara, & Stout, 2010; Kruschke, 2014; Vassileva et al., 2013). The (posterior) distributions show the uncertainty in the estimated parameters and we can use the posterior highest density interval (HDI) to summarize the uncertainty. 95% HDI

refers to “the span of values that are most credible and cover 95% of the posterior distribution” (Kruschke, 2014). To make a decision about whether a particular parameter is *credibly different* between the two groups, we can calculate the difference of the hyper-distributions across the groups, and then examine if the 95% HDI of the difference excludes zero.

As an example, let’s compare two groups’ model parameters in a Bayesian fashion. First, prepare each group’ data as separate text files:

```
data_group1 = "~/Project_folder/gng_data_group1.txt"
data_group2 = "~/Project_folder/gng_data_group2.txt"
```

Here, `gng_data_group1.txt` and `gng_data_group2.txt` contain all group 1 subjects’ and group 2 subjects’ data, respectively. Next, the model is fit in the same manner as before on each group separately. We recommend the same number of chains and MCMC samples be used for each group:

```
output_group1 = gng_m4(data_group1, nchain=3, ncore=3)
output_group2 = gng_m4(data_group2, nchain=3, ncore=3)
```

Make sure to check if MCMC samples are well mixed and converged to stationary distributions (**Section 5.4.3**). Next, compute the difference between the hyper (group) parameters of interest by making a simple subtraction. For example, if we want to compare the Pavlovian bias parameter ( $\pi$ ) across the two groups:

```
diffDist = output_group1$parVals$mu_pi -
output_group2$parVals$mu_pi
```

The above command subtracts the `mu_pi` parameter of group 2 from that of group 1. Note that these parameter values are stored within the `parVals` element of an

hBayesDM object. To test if the groups are “credibly” different, users can check if the 95% HDI excludes 0. The following command will print the 95% HDI to the R console:

```
HDIofMCMC(diffDist)
```

Users can also visually inspect 95% HDI with the following command (95% HDI is also printed to the R console with the command):

```
plotHDI(diffDist)
```

**Figure 5B** shows the result of the `plotHDI()` command above. The red bar along the bottom of the plot encompasses the 95% HDI. Here, 95% HDI excludes zero, so we can conclude that the groups are credibly different with respect to the model parameter that is being compared.

### 5.5. Extracting trial-by-trial regressors for model-based fMRI/EEG analysis

In model-based fMRI or EEG (Mars et al., 2008; e.g., O'Doherty et al., 2007), model-based time series of a latent cognitive process are generated by computational models, and then time series data are regressed against fMRI or EEG data. This model-based neuroimaging approach has been particularly popular in cognitive neuroscience (e.g., Ahn, Krawitz, Kim, Busmeyer, & Brown, 2011a; Behrens, Woolrich, Walton, & Rushworth, 2007; Daw et al., 2006; Gläscher et al., 2009; Gläscher, Daw, Dayan, & Doherty, 2010; Hampton, 2006; Iglesias et al., 2013; Kable & Glimcher, 2007; O'Doherty et al., 2007; O'Doherty, Critchley, Deichmann, & Dolan, 2003; Xiang et al., 2013) to identify brain regions that presumably implement a cognitive process of interest.

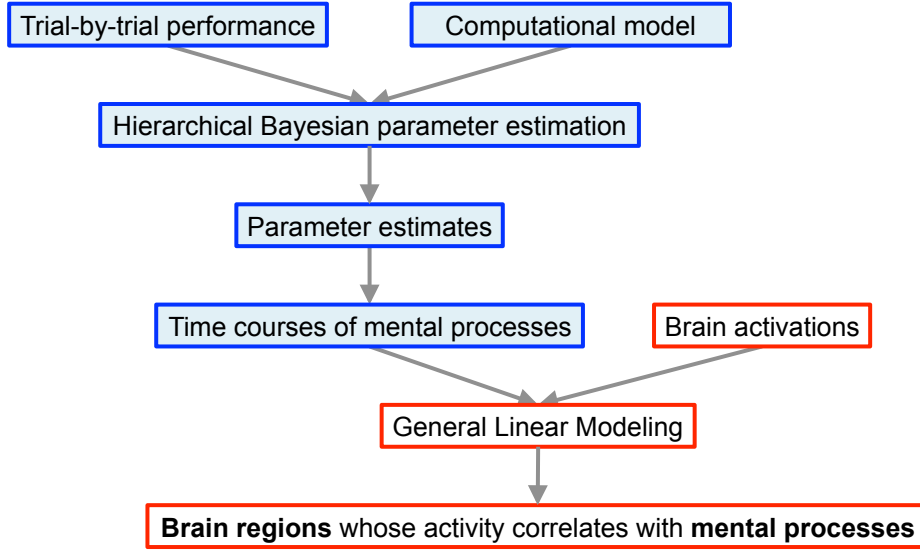

**Figure 6.** Steps of model-based fMRI. With the hBayesDM package, users can perform the steps highlighted in blue. Users need to use a neuroimaging tool of their choice (e.g., SPM) to perform steps highlighted in red.

The hBayesDM package allows users to extract various model-based regressors that can be used for model-based fMRI or EEG analysis (see **Figure 6**). All model-based regressors are contained in the `modelRegressor` element. Note that in the current version (version 2.3.0), only the orthogonalized GNG task provides model-based regressors. The hBayesDM package provides the following model-based regressors, and users can convolve these trial-by-trial data with a hemodynamic response function with their favorite package (e.g., in Statistical Parametric Mapping (SPM; <http://www.fil.ion.ucl.ac.uk/spm/>), users can use the ‘parametric modulation’ command with a model-based regressor):

1. Stimulus value:  $V_t(s_t)$  (stored as `SV`; available in `gng_m3` and `gng_m4`)
2. Action value:  $Q_t(go)$  (stored as `Qgo`) and  $Q_t(NoGo)$  (stored as `Qnogo`)
3. Action weight:  $W_t(go)$  (stored as `Wgo`) and  $W_t(NoGo)$  (stored as `Wnogo`)

For example, to retrieve the stimulus value ( $=V_t(s_t)$ ) of the group 1 in the previous example (output is saved as `output_group1`), type:

```
sv_all = output_group1$modelRegressor$SV # store SV in 'sv_all'
```

Here, `sv_all` is an array (the number of rows = the number of subjects & the number of columns = the number of trials). Similarly, to retrieve action weight values ( $W_i(go)$  and  $W_i(NoGo)$ ), type:

```
Wgo_all = output_group1$modelRegressor$Wgo # store W(go) in  
'Wgo_all'  
  
Wnogo_all = output_group1$modelRegressor$Wnogo # store W(nogo)  
in 'Wnogo_all'
```

Users can use these values for each subject to perform model-based fMRI analysis with their favorite neuroimaging package (O'Doherty et al., 2007). Once model-based regressors are entered as parametric modulators in the GLM, neuroimaging tools convolve the regressors with the HRF and construct a GLM. For step-by-step tutorials for model-based fMRI, see the following online documents

([http://www.translationalneuromodeling.org/uploads/Mathys2016\\_SPMZurich\\_ModelBasedfMRI.pdf](http://www.translationalneuromodeling.org/uploads/Mathys2016_SPMZurich_ModelBasedfMRI.pdf);

[http://www.translationalneuromodeling.org/uploads/DiaconescuAndreea\\_Model-based\\_fmri.pdf](http://www.translationalneuromodeling.org/uploads/DiaconescuAndreea_Model-based_fmri.pdf);

[http://www.srndna.org/conference2015/files/2014/11/SRNDNA\\_RL\\_Modeling\\_wkshp2.pdf](http://www.srndna.org/conference2015/files/2014/11/SRNDNA_RL_Modeling_wkshp2.pdf)).

## 6. Future directions

In the current version (version 2.3.0), the hBayesDM package implements just eight RLDM tasks and their models, but we plan to expand the list of tasks and models, so that the hBayesDM can handle an extensive list of RLDM tasks. Latent model-based regressors are available only for a single task, but they will be available for all the tasks in the hBayesDM package in a future release. The hBayesDM package is useful also for experts in computational modeling, not just for beginners – hBayesDM systematically

implements HBA of various computational models and we find it useful and easier to build new models based on the existing framework. We welcome collaboration and others' contributions to the package. We plan to release a more detailed tutorial on how to modify existing codes and build new models based on our framework.

In our HBA framework, it is assumed that there is a single hyper-group across all subjects. While it allows more precise estimates with a modest number of subjects (Ahn, Krawitz, Kim, Busemeyer, & Brown, 2011a; Katahira, 2016), the assumption might be invalid with a large (e.g., ~1000) number of subjects (Ahn & Busemeyer, 2016; Ratcliff & Childers, 2015). Bayesian hierarchical mixture approaches (Bartlema, Lee, Wetzels, & Vanpaemel, 2014) or HBA on subgroups first clustered by behavioral indices (Ahn et al., in preparation) might be an alternative solution when we need to fit large number samples.

In conclusion, the hBayesDM package will allow researchers with minimal quantitative background to do cutting-edge hierarchical modeling on a variety of RLDM tasks. With hBayesDM, researchers can also easily generate model-based regressors required for model-based fMRI/EEG analysis. It is our expectation that the hBayesDM package will contribute to the dissemination of computational modeling and computational psychiatric research to researchers in various fields including mental health.



## References

- Agay, N., Kron, S., Carmel, Z., Mendlovic, S., & Levkovitz, Y. (2008). Ultimatum bargaining behavior of people affected by schizophrenia. *Psychiatry Research*, 157(1-3), 39–46. <http://doi.org/10.1016/j.psychres.2006.03.026>
- Ahn, W.-Y., & Busemeyer, J. R. (2016). Challenges and promises for translating computational tools into clinical practice. *Current Opinion in Behavioral Sciences*, 11, 1–7.
- Ahn, W.-Y., & Vassileva, J. (2016). Machine-learning identifies substance-specific behavioral markers for opiate and stimulant dependence. *Drug and Alcohol Dependence*, 161, 247–257. <http://doi.org/10.1016/j.drugalcdep.2016.02.008>
- Ahn, W.-Y., Busemeyer, J. R., Wagenmakers, E. J., & Stout, J. C. (2008). Comparison of decision learning models using the generalization criterion method. *Cognitive Science*, 32(8), 1376–1402. <http://doi.org/10.1080/03640210802352992>
- Ahn, W.-Y., Krawitz, A., Kim, W., Busemeyer, J. R., & Brown, J. W. (2011a). A model-based fMRI analysis with hierarchical Bayesian parameter estimation. *Journal of Neuroscience, Psychology, and Economics*, 4(2), 95–110. <http://doi.org/10.1037/a0020684>
- Ahn, W.-Y., Rass, O., Fridberg, D. J., Bishara, A. J., Forsyth, J. K., Breier, A., et al. (2011b). Temporal discounting of rewards in patients with bipolar disorder and schizophrenia. *Journal of Abnormal Psychology*, 120(4), 911–921. <http://doi.org/10.1037/a0023333>
- Ahn, W.-Y., Vasilev, G., Lee, S.-H., Busemeyer, J. R., Kruschke, J. K., Bechara, A., & Vassileva, J. (2014). Decision-making in stimulant and opiate addicts in protracted abstinence: evidence from computational modeling with pure users. *Frontiers in Decision Neuroscience*, 5. <http://doi.org/10.3389/fpsyg.2014.00849>
- Akaike, H. (1987). Factor analysis and AIC. *Psychometrika*, 52(3), 317–332.
- Albrecht, M. A., Waltz, J. A., Cavanagh, J. F., Frank, M. J., & Gold, J. M. (2016). Reduction of Pavlovian Bias in Schizophrenia: Enhanced Effects in Clozapine-Administered Patients. *PLoS ONE*, 11(4), e0152781. <http://doi.org/10.1371/journal.pone.0152781>
- Bartlema, A., Lee, M., Wetzels, R., & Vanpaemel, W. (2014). A Bayesian hierarchical mixture approach to individual differences: case studies in selective attention and representation in category learning. *Journal of Mathematical Psychology*, 59, 132–150. <http://doi.org/10.1016/j.jmp.2013.12.002>
- Bechara, A., & Martin, E. M. (2004). Impaired Decision Making Related to Working Memory Deficits in Individuals With Substance Addictions. *Neuropsychology*, 18(1), 152–162. <http://doi.org/10.1037/0894-4105.18.1.152>
- Bechara, A., Damasio, A. R., Damasio, H., & Anderson, S. W. (1994). Insensitivity to future consequences following damage to human prefrontal cortex. *Cognition*, 50(1), 7–15.

- Bechara, A., Dolan, S., Denburg, N., Hindes, A., Anderson, S. W., & Nathan, P. E. (2001). Decision-making deficits, linked to a dysfunctional ventromedial prefrontal cortex, revealed in alcohol and stimulant abusers. *Neuropsychologia*, 39(4), 376–389. [http://doi.org/10.1016/S0028-3932\(00\)00136-6](http://doi.org/10.1016/S0028-3932(00)00136-6)
- Behrens, T. E. J., Woolrich, M. W., Walton, M. E., & Rushworth, M. F. S. (2007). Learning the value of information in an uncertain world. *Nature Neuroscience*, 10(9), 1214–1221. <http://doi.org/10.1038/nn1954>
- Bolla, K. I., Eldreth, D. A., London, E. D., Kiehl, K. A., Mouratidis, M., Contoreggi, C., et al. (2003). Orbitofrontal cortex dysfunction in abstinent cocaine abusers performing a decision-making task, 19(3), 1085–1094. [http://doi.org/10.1016/S1053-8119\(03\)00113-7](http://doi.org/10.1016/S1053-8119(03)00113-7)
- Bozdogan, H. (1987). Model selection and Akaike's Information Criterion (AIC): The general theory and its analytical extensions. *Psychometrika*, 52(3), 345–370.
- Busmeyer, J. R., & Diederich, A. (2010). Cognitive modeling. SAGE. <http://doi.org/10.1037/e722292011-099>
- Busmeyer, J. R., & Wang, Y.-M. (2000). Model Comparisons and Model Selections Based on Generalization Criterion Methodology. *Journal of Mathematical Psychology*, 44(1), 1–19. <http://doi.org/10.1006/jmps.1999.1282>
- Carpenter, B., Gelman, A., Hoffman, M., Lee, D., Goodrich, B., Betancourt, M., et al. (2016). Stan: A probabilistic programming language. *Journal of Statistical Software*.
- Cavanagh, J. F., Eisenberg, I., Guitart-Masip, M., Huys, Q., & Frank, M. J. (2013). Frontal Theta Overrides Pavlovian Learning Biases. *Journal of Neuroscience*, 33(19), 8541–8548.
- Chan, T. W. S., Ahn, W.-Y., Bates, J. E., Busmeyer, J. R., Guillaume, S., Redgrave, G. W., et al. (2014). Differential impairments underlying decision making in anorexia nervosa and bulimia nervosa: a cognitive modeling analysis. *The International Journal of Eating Disorders*, 47(2), 157–167. <http://doi.org/10.1002/eat.22223>
- Chowdhury, R., Guitart-Masip, M., Lambert, C., Dolan, R. J., & Duzel, E. (2013). Structural integrity of the substantia nigra and subthalamic nucleus predicts flexibility of instrumental learning in older-age individuals, 34(10), 2261–2270. <http://doi.org/10.1016/j.neurobiolaging.2013.03.030>
- Cools, R., Clark, L., Owen, A. M., & Robbins, T. W. (2002). Defining the neural mechanisms of probabilistic reversal learning using event-related functional magnetic resonance imaging. *Journal of Neuroscience*, 22(11), 4563–4567.
- Csukly, G., Polgár, P., Tombor, L., Réthelyi, J., & Kéri, S. (2011). Are patients with schizophrenia rational maximizers? Evidence from an ultimatum game study. *Psychiatry Research*, 187(1-2), 11–17. <http://doi.org/10.1016/j.psychres.2010.10.005>
- Daunizeau, J., Adam, V., & Rigoux, L. (2014). VBA: A Probabilistic Treatment of Nonlinear Models for Neurobiological and Behavioural Data. *PLoS Comput Biol*, 10(1), e1003441.

- Daw, N. D., O'Doherty, J. P., Dayan, P., Seymour, B., & Dolan, R. J. (2006). Cortical substrates for exploratory decisions in humans., *441*(7095), 876–879.  
<http://doi.org/10.1038/nature04766>
- Dayan, P., & Daw, N. D. (2008). Decision theory, reinforcement learning, and the brain. *Cognitive, Affective, and Behavioral Neuroscience*, *8*(4), 429–453.  
<http://doi.org/10.3758/CABN.8.4.429>
- Ebert, J., & Prelec, D. (2007). The fragility of time: Time-insensitivity and valuation of the near and far future. *Management Science*, *53*(9), 1423–1438.
- Ersche, K. D., Roiser, J. P., Robbins, T. W., & Sahakian, B. J. (2008). Chronic cocaine but not chronic amphetamine use is associated with perseverative responding in humans. *Psychopharmacology*, *197*(3), 421–431. <http://doi.org/10.1007/s00213-007-1051-1>
- Forstmann, B. U., & Wagenmakers, E.-J. (2015). An Introduction to Model-Based Cognitive Neuroscience. Springer. <http://doi.org/10.1007/978-1-4939-2236-9.pdf>
- Fridberg, D. J., Ahn, W.-Y., Kim, W., Bishara, A. J., & Stout, J. C. (2010). Cognitive mechanisms underlying risky decision-making in chronic cannabis users. *Journal of Mathematical Psychology*, *54*(1), 28–38. <http://doi.org/10.1016/j.jmp.2009.10.002>
- Friston, K. J., Stephan, K. E., Montague, P. R., & Dolan, R. J. (2014). Computational psychiatry: the brain as a phantastic organ. *The Lancet. Psychiatry*, *1*(2), 148–158. [http://doi.org/10.1016/S2215-0366\(14\)70275-5](http://doi.org/10.1016/S2215-0366(14)70275-5)
- Gelman, A., & Rubin, D. B. (1992). Inference from iterative simulation using multiple sequences. *Statistical Science*. <http://doi.org/10.2307/2246093>
- Gelman, A., Dunson, D. B., & Vehtari, A. (2013). Bayesian Data Analysis (Third Edition). CRC Press.
- Gläscher, J., Daw, N. D., Dayan, P., & Doherty, J. P. O. (2010). States versus Rewards: Dissociable Neural Prediction Error Signals Underlying Model-Based and Model-Free Reinforcement Learning, *66*(4), 585–595.  
<http://doi.org/10.1016/j.neuron.2010.04.016>
- Gläscher, J., Hampton, A. N., & O'Doherty, J. P. (2009). Determining a role for ventromedial prefrontal cortex in encoding action-based value signals during reward-related decision making. *Cereb Cortex*, *19*(2), 483–495.  
<http://doi.org/10.1093/cercor/bhn098>
- Grant, S., Contoreggi, C., & London, E. D. (2000). Drug abusers show impaired performance in a laboratory test of decision making. *Neuropsychologia*, *38*(8), 1180–1187.
- Green, L., & Myerson, J. (2004). A Discounting Framework for Choice With Delayed and Probabilistic Rewards. *Psychological Bulletin*, *130*(5), 769–792.  
<http://doi.org/10.1037/0033-2909.130.5.769>
- Gu, X., Wang, X., Hula, A., Wang, S., Xu, S., Lohrenz, T. M., et al. (2015). Necessary, yet dissociable contributions of the insular and ventromedial prefrontal cortices to

- norm adaptation: computational and lesion evidence in humans. *Journal of Neuroscience*, 35(2), 467–473. <http://doi.org/10.1523/JNEUROSCI.2906-14.2015>
- Guitart-Masip, M., Duzel, E., Dolan, R., & Dayan, P. (2014). Action versus valence in decision making. *Trends in Cognitive Sciences*, 18(4), 194–202. <http://doi.org/10.1016/j.tics.2014.01.003>
- Guitart-Masip, M., Huys, Q. J. M., Fuentemilla, L., Dayan, P., Duzel, E., & Dolan, R. J. (2012). Go and no-go learning in reward and punishment: interactions between affect and effect. *NeuroImage*, 62(1), 154–166. <http://doi.org/10.1016/j.neuroimage.2012.04.024>
- Güth, W., Schmittberger, R., & Schwarze, B. (1982). An experimental analysis of ultimatum bargaining. *Journal of Economic Behavior & Organization*, 3(4), 367–388. [http://doi.org/10.1016/0167-2681\(82\)90011-7](http://doi.org/10.1016/0167-2681(82)90011-7)
- Hampton, A. N. (2006). The Role of the Ventromedial Prefrontal Cortex in Abstract State-Based Inference during Decision Making in Humans. *Journal of Neuroscience*, 26(32), 8360–8367. <http://doi.org/10.1523/JNEUROSCI.1010-06.2006>
- Heerey, E. A., Matveeva, T. M., & Gold, J. M. (2011). Imagining the future: Degraded representations of future rewards and events in schizophrenia. *Journal of Abnormal Psychology*, 120(2), 483–489. <http://doi.org/10.1037/a0021810>
- Heerey, E. A., Robinson, B. M., McMahon, R. P., & Gold, J. M. (2007). Delay discounting in schizophrenia. *Cognitive Neuropsychiatry*, 12(3), 213–221. <http://doi.org/10.1080/13546800601005900>
- Hertwig, R., Barron, G., Weber, E. U., & Erev, I. (2004). Decisions from experience and the effect of rare events in risky choice. *Psychological Science*, 15(8), 534–539.
- Hinson, J. M., Jameson, T. L., & Whitney, P. (2003). Impulsive decision making and working memory. *Journal of Experimental Psychology: Learning, Memory, and Cognition*, 29(2), 298–306. <http://doi.org/10.1037/0278-7393.29.2.298>
- Huys, Q. J. M., Cools, R., Gölzer, M., Friedel, E., Heinz, A., Dolan, R. J., & Dayan, P. (2011). Disentangling the Roles of Approach, Activation and Valence in Instrumental and Pavlovian Responding. *PLoS Comput Biol*, 7(4), e1002028. <http://doi.org/10.1371/journal.pcbi.1002028.t002>
- Huys, Q. J. M., Maia, T. V., & Frank, M. J. (2016). Computational psychiatry as a bridge from neuroscience to clinical applications. *Nature Neuroscience*, 19(3), 404–413. <http://doi.org/10.1038/nn.4238>
- Iglesias, S., Mathys, C., Brodersen, K. H., Kasper, L., Piccirelli, M., Ouden, den, H. E. M., & Stephan, K. E. (2013). Hierarchical Prediction Errors in Midbrain and Basal Forebrain during Sensory Learning, 80(2), 519–530. <http://doi.org/10.1016/j.neuron.2013.09.009>
- Insel, T. R. (2014). The NIMH Research Domain Criteria (RDoC) Project: Precision Medicine for Psychiatry. *American Journal of Psychiatry*, 171(4), 395–397. <http://doi.org/10.1176/appi.ajp.2014.14020138>

- Kable, J. W., & Glimcher, P. W. (2007). The neural correlates of subjective value during intertemporal choice. *Nature Neuroscience*, 10(12), 1625–1633.  
<http://doi.org/10.1038/nn2007>
- Katahira, K. (2016). How hierarchical models improve point estimates of model parameters at the individual level. *Journal of Mathematical Psychology*, 73, 37–58.  
<http://doi.org/10.1016/j.jmp.2016.03.007>
- Koenigs, M., Young, L., Adolphs, R., Tranel, D., Cushman, F., Hauser, M., & Damasio, A. (2007). Damage to the prefrontal cortex increases utilitarian moral judgements., 446(7138), 908–911. <http://doi.org/10.1038/nature05631>
- Kruschke, J. (2014). Doing Bayesian data analysis: A tutorial with R, JAGS, and Stan.
- Lee, M. D. (2011). How cognitive modeling can benefit from hierarchical Bayesian models. *Journal of Mathematical Psychology*, 55(1), 1–7.  
<http://doi.org/10.1016/j.jmp.2010.08.013>
- Lewandowsky, S., & Farrell, S. (2010). Computational modeling in cognition: Principles and practice. Sage.
- Li, J., Schiller, D., Schoenbaum, G., Phelps, E. A., & Daw, N. D. (2011). Differential roles of human striatum and amygdala in associative learning. *Nature Neuroscience*, 14(10), 1250–1252. <http://doi.org/10.1038/nn.2904>
- Lunn, D. J., Thomas, A., Best, N., & Spiegelhalter, D. (2000). WinBUGS-a Bayesian modelling framework: concepts, structure, and extensibility. *Statistics and Computing*, 10(4), 325–337.
- Lunn, D., Spiegelhalter, D., Thomas, A., & Best, N. (2009). The BUGS project: Evolution, critique and future directions. *Statistics in Medicine*, 28(25), 3049–3067.  
<http://doi.org/10.1002/sim.3680>
- MacKillop, J. (2013). Integrating behavioral economics and behavioral genetics: delayed reward discounting as an endophenotype for addictive disorders. *Journal of the Experimental Analysis of Behavior*, 99(1), 14–31. <http://doi.org/10.1002/jeab.4>
- Mars, R. B., Debener, S., Gladwin, T. E., Harrison, L. M., Haggard, P., Rothwell, J. C., & Bestmann, S. (2008). Trial-by-Trial Fluctuations in the Event-Related Electroencephalogram Reflect Dynamic Changes in the Degree of Surprise. *Journal of Neuroscience*, 28(47), 12539–12545. <http://doi.org/10.1523/JNEUROSCI.2925-08.2008>
- Matzke, D., Love, J., Wiecki, T. V., Brown, S. D., Logan, G. D., & Wagenmakers, E.-J. (2013). Release the BEESTS: Bayesian Estimation of Ex-Gaussian STop-Signal reaction time distributions. *Frontiers in Psychology*, 4, 918.  
<http://doi.org/10.3389/fpsyg.2013.00918>
- Mazur, J. E. (1987). An adjusting procedure for studying delayed reinforcement. In M. L. Commons, J. E. Mazur, J. A. Nevin, & H. Rachlin (Eds.), *Quantitative Analyses of Behavior* (pp. 55–73). Commons. <http://doi.org/10.2307/1449146?ref=search-gateway:bae0459b9d53bb6ebb88e2d2afcdc47a>

- Montague, P. R., & Lohrenz, T. (2007). To detect and correct: norm violations and their enforcement., *56*(1), 14–18. <http://doi.org/10.1016/j.neuron.2007.09.020>
- Montague, P. R., Dolan, R. J., Friston, K. J., & Dayan, P. (2012). Computational psychiatry. *Trends in Cognitive Sciences*, *16*(1), 72–80. <http://doi.org/10.1016/j.tics.2011.11.018>
- Murphy, F. C., Michael, A., Robbins, T. W., & Sahakian, B. J. (2003). Neuropsychological impairment in patients with major depressive disorder: the effects of feedback on task performance. *Psychol Med*, *33*(3), 455–467. <http://doi.org/10.1017/S0033291702007018>
- Myung, I. J. (2003). Tutorial on maximum likelihood estimation. *Journal of Mathematical Psychology*, *47*(1), 90–100. [http://doi.org/10.1016/S0022-2496\(02\)00028-7](http://doi.org/10.1016/S0022-2496(02)00028-7)
- O'Doherty, J. P., Hampton, A., & Kim, H. (2007). Model-Based fMRI and Its Application to Reward Learning and Decision Making. *Ann. N. Y. Acad. Sci.*, *1104*(1), 35–53. <http://doi.org/10.1196/annals.1390.022>
- O'Doherty, J., Critchley, H., Deichmann, R., & Dolan, R. J. (2003). Dissociating valence of outcome from behavioral control in human orbital and ventral prefrontal cortices. *Journal of Neuroscience*, *23*(21), 7931–7939.
- O'Doherty, J., Dayan, P., Schultz, J., & Deichmann, R. (2004). Dissociable roles of ventral and dorsal striatum in instrumental conditioning. <http://doi.org/10.1126/science.1094285>
- Ouden, den, H. E. M., Daw, N. D., FernAndez, G., Elshout, J. A., Rijpkema, M., Hoogman, M., et al. (2013). Dissociable Effects of Dopamine and Serotonin on Reversal Learning, *80*(4), 1090–1100. <http://doi.org/10.1016/j.neuron.2013.08.030>
- Plummer, M. (2003). JAGS: A program for analysis of Bayesian graphical models using Gibbs sampling (pp. 20–22). Presented at the Proceedings of the 3rd International Workshop on Distributed Statistical Computing (DSC 2003). March.
- Rachlin, H., Raineri, A., & Cross, D. (1991). Subjective probability and delay. *Journal of the Experimental Analysis of Behavior*, *55*(2), 233–244. <http://doi.org/10.1901/jeab.1991.55-233>
- Raja Beharelle, A., Polania, R., Hare, T. A., & Ruff, C. C. (2015). Transcranial Stimulation over Frontopolar Cortex Elucidates the Choice Attributes and Neural Mechanisms Used to Resolve Exploration-Exploitation Trade-Offs. *Journal of Neuroscience*, *35*(43), 14544–14556. <http://doi.org/10.1523/JNEUROSCI.2322-15.2015>
- Rangel, A., Camerer, C. F., & Montague, P. R. (2008). A framework for studying the neurobiology of value-based decision making., *9*(7), 545–556. <http://doi.org/10.1038/nrn2357>
- Ratcliff, R., & Childers, R. (2015). Individual differences and fitting methods for the two-choice diffusion model of decision making. *Decision*, *2*(4), 237–279.

- <http://doi.org/10.1037/dec0000030>
- Samuelson, P. A. (1937). A Note on Measurement of Utility. *The Review of Economic Studies*, 4(2), 155.
- Sanfey, A. G. (2003). The Neural Basis of Economic Decision-Making in the Ultimatum Game, 300(5626), 1755–1758. <http://doi.org/10.1126/science.1082976>
- Shamosh, N. A., DeYoung, C. G., Green, A. E., Reis, D. L., Johnson, M. R., Conway, A. R. A., et al. (2008). Individual Differences in Delay Discounting Relation to Intelligence, Working Memory, and Anterior Prefrontal Cortex. *Psychological Science*, 19(9), 904–911. <http://doi.org/10.1111/j.1467-9280.2008.02175.x>
- Shiffrin, R. M., Lee, M. D., Kim, W., & Wagenmakers, E.-J. (2008). A survey of model evaluation approaches with a tutorial on hierarchical Bayesian methods. *Cognitive Science*, 32(8), 1248–1284. <http://doi.org/10.1080/03640210802414826>
- Sokol-Hessner, P., Camerer, C. F., & Phelps, E. A. (2012). Emotion regulation reduces loss aversion and decreases amygdala responses to losses. *Social Cognitive and Affective Neuroscience*. <http://doi.org/10.1093/scan/nss002>
- Sokol-Hessner, P., Hsu, M., Curley, N. G., Delgado, M. R., Camerer, C. F., & Phelps, E. A. (2009). Thinking like a trader selectively reduces individuals' loss aversion. *Proc. Natl. Acad. Sci. U.S.A.*, 106(13), 5035–5040. <http://doi.org/10.1073/pnas.0806761106>
- Spiegelhalter, D. J., Best, N. G., Carlin, B. P., & van der Linde, A. (2002). Bayesian Measures of Model Complexity and Fit. *Journal of the Royal Statistical Society: Series B (Statistical Methodology)*, 64(4), 583–639. <http://doi.org/10.2307/3088806?ref=search-gateway:9dd301fe61b31fd13f661d1d52837d97>
- Steingroever, H., Wetzels, R., & Wagenmakers, E. J. (2013). Absolute Performance of Reinforcement-Learning Models for the Iowa Gambling Task. <http://doi.org/10.1037/dec0000005>
- Stephan, K. E., Bach, D. R., Fletcher, P. C., Flint, J., Frank, M. J., Friston, K. J., et al. (2016a). Charting the landscape of priority problems in psychiatry, part 1: classification and diagnosis. *The Lancet. Psychiatry*, 3(1), 77–83. [http://doi.org/10.1016/S2215-0366\(15\)00361-2](http://doi.org/10.1016/S2215-0366(15)00361-2)
- Stephan, K. E., Binder, E. B., Breakspear, M., Dayan, P., Johnstone, E. C., Meyer-Lindenberg, A., et al. (2016b). Charting the landscape of priority problems in psychiatry, part 2: pathogenesis and aetiology. *The Lancet. Psychiatry*, 3(1), 84–90. [http://doi.org/10.1016/S2215-0366\(15\)00360-0](http://doi.org/10.1016/S2215-0366(15)00360-0)
- Stephan, K. E., Iglesias, S., Heinzle, J., & Diaconescu, A. O. (2015). Translational Perspectives for Computational Neuroimaging, 87(4), 716–732. <http://doi.org/10.1016/j.neuron.2015.07.008>
- Thaler, R. H. (1988). Anomalies: The ultimatum game. *The Journal of Economic Perspectives*, 2(4), 195–206. <http://doi.org/10.2307/1942788>
- Tom, S. M., Fox, C. R., Trepel, C., & Poldrack, R. A. (2007). The Neural Basis of Loss

- Aversion in Decision-Making Under Risk, *315*(5811), 515–518.  
<http://doi.org/10.1126/science.1134239>
- Vassileva, J., Ahn, W.-Y., Weber, K. M., Busemeyer, J. R., Stout, J. C., Gonzalez, R., & Cohen, M. H. (2013). Computational modeling reveals distinct effects of HIV and history of drug use on decision-making processes in women. *PLoS ONE*, *8*(8), e68962. <http://doi.org/10.1371/journal.pone.0068962>
- Vassileva, J., Gonzalez, R., Bechara, A., & Martin, E. M. (2007). Are all drug addicts impulsive? Effects of antisociality and extent of multidrug use on cognitive and motor impulsivity. *Addict Behav*, *32*(12), 3071–3076.  
<http://doi.org/10.1016/j.addbeh.2007.04.017>
- Vehtari, A., Gelman, A., & Gabry, J. (2016). Practical Bayesian model evaluation using leave-one-out cross-validation and WAIC. *arXiv.org*.
- Wabersich, D., & Vandekerckhove, J. (2014). The RWiener package: An R package providing distribution functions for the Wiener diffusion model. *R Journal*.
- Waltz, J. A., & Gold, J. M. (2007). Probabilistic reversal learning impairments in schizophrenia: Further evidence of orbitofrontal dysfunction. *Schizophrenia Research*, *93*(1-3), 296–303. <http://doi.org/10.1016/j.schres.2007.03.010>
- Wang, X.-J., & Krystal, J. H. (2014). Computational Psychiatry, *84*(3), 638–654.  
<http://doi.org/10.1016/j.neuron.2014.10.018>
- Wiecki, T. V., Poland, J., & Frank, M. J. (2015). Model-Based Cognitive Neuroscience Approaches to Computational Psychiatry Clustering and Classification. *Clinical Psychological Science*.
- Wiecki, T. V., Sofer, I., & Frank, M. J. (2013). HDDM: Hierarchical Bayesian estimation of the Drift-Diffusion Model in Python. *Frontiers in Neuroinformatics*, *7*.  
<http://doi.org/10.3389/fninf.2013.00014>
- Worthy, D. A., Pang, B., & Byrne, K. A. (2013). Decomposing the Roles of Perseveration and Expected Value Representation in Models of the Iowa Gambling Task. *Frontiers in Psychology*, *4*. <http://doi.org/10.3389/fpsyg.2013.00640>
- Xiang, T., Lohrenz, T., & Montague, P. R. (2013). Computational Substrates of Norms and Their Violations during Social Exchange. *The Journal of Neuroscience*.



**Acknowledgements:** W.-Y.A. programmed prototypes for several tasks while he was advised by Jerome Busemeyer (for the Iowa Gambling Task) or P. Read Montague/Peter Dayan (for Orthogonalized Go/NoGo, Two-Step, and Risk-Aversion tasks as well as the Ultimatum Game). We thank them for their guidance and resources provided to W.-Y.A. L.Z. was supported by German Research Foundation (DFG GRK 1247) and Bernstein Computational Neuroscience Program of the German Federal Ministry of Education and Research (BMBF Grant 01GQ1006).

**Author contributions:** W.-Y.A. conceived and designed the project. W.-Y.A., N.H., and L.Z. programmed codes for hierarchical Bayesian modeling. N.H. built an R package and wrote help files. W.-Y.A., N.H., and L.Z. wrote the paper.
